# Supplementary material
Source: PubMed Central journal article supplement (PMC4784874)
Supplement: nouj022376.ww2_default.pdf [file nouj022376.ww2_default.pdf]

## **Appendix 2 Supplementary tables A-M [posted as supplied by author]**

### **List of Tables**

Table A – Pairwise comparison tables – Primary and secondary efficacy variables (8 weeks)

Table B – Additional AEs found during review of 93 CRFs (acute phase plus taper)

Table C – Breakdown of new adverse events found during CRF review by System Organ Class (SOC) (MedDRA)

Table D – Summary of all adverse events within each SOC, including those classed as 'Severe' by investigator

Table E – Full breakdown of all adverse events within each SOC, including those classed as 'Severe' by investigator – events from CSR check only

Table F – Summary of adverse events during taper phase only

Table G – Breakdown of adverse events during taper phase only

Table H – Changes to 'reasons for discontinuation' during acute (plus taper) phase

- a) Paroxetine group
- b) Imipramine group
- c) Placebo group

Table I – Baseline screening errors (found during safety review)

Table J – Suicidality at screening (Kiddie-SADS)

- a) Kiddie-SADS items 108-117 'Suicidal ideation' at screening visit (-1 week)
- b) Kiddie-SADS item 108 'Suicidal ideation' – 'Current Episode' at screening (-1 week)
- c) Kiddie-SADS item 109 'Suicidal ideation' – 'Last Two Weeks' at screening (-1 week)

Table K – Types of medication taken 1 month prior to enrolment

Table L – Adverse events occurring in patients taking other medication during month prior to enrolment vs. those taking no other medication

- a) Paroxetine group
- b) Imipramine group
- c) Placebo group

Table M – Attrition of patients by week

**Table A – Pairwise comparison tables – Primary and secondary efficacy variables (8 weeks)**

| <b>Primary Efficacy Variables [8 Weeks]</b> |             |                |                                  |                                  |                                     |
|---------------------------------------------|-------------|----------------|----------------------------------|----------------------------------|-------------------------------------|
|                                             |             | <b>Omnibus</b> | <b>Paroxetine<br/>v. Placebo</b> | <b>Imipramine<br/>v. Placebo</b> | <b>Paroxetine<br/>v. Imipramine</b> |
| <b>Analysis of Variance</b>                 |             |                |                                  |                                  |                                     |
| <b>HAM-D Change</b>                         | <b>OC</b>   | <b>0.255</b>   | <b>0.106</b>                     | <b>0.673</b>                     | <b>0.261</b>                        |
|                                             | <b>LOCF</b> | <b>0.204</b>   | <b>0.153</b>                     | <b>0.895</b>                     | <b>0.109</b>                        |
| <b>Logistical Regression</b>                |             |                |                                  |                                  |                                     |
| <b>HAM-D Response<br/>≥50% drop or ≤8</b>   | <b>OC</b>   | <b>0.131</b>   | <b>0.044</b>                     | <b>0.337</b>                     | <b>0.332</b>                        |
|                                             | <b>LOCF</b> | <b>0.269</b>   | <b>0.117</b>                     | <b>0.651</b>                     | <b>0.253</b>                        |

| <b>Secondary Efficacy Variables [8 Weeks]</b>    |             |                |                                  |                                  |                                     |
|--------------------------------------------------|-------------|----------------|----------------------------------|----------------------------------|-------------------------------------|
|                                                  |             | <b>Omnibus</b> | <b>Paroxetine<br/>v. Placebo</b> | <b>Imipramine<br/>v. Placebo</b> | <b>Paroxetine<br/>v. Imipramine</b> |
| <b>Analysis of Variance</b>                      |             |                |                                  |                                  |                                     |
| <b>K-SADS-L Change</b>                           | <b>OC</b>   | <b>0.459</b>   | <b>0.209</b>                     | <b>0.679</b>                     | <b>0.447</b>                        |
|                                                  | <b>LOCF</b> | <b>0.131</b>   | <b>0.072</b>                     | <b>0.902</b>                     | <b>0.084</b>                        |
| <b>CGI Mean Score</b>                            | <b>OC</b>   | <b>0.086</b>   | <b>0.034</b>                     | <b>0.269</b>                     | <b>0.289</b>                        |
|                                                  | <b>LOCF</b> | <b>0.155</b>   | <b>0.084</b>                     | <b>0.836</b>                     | <b>0.124</b>                        |
| <b>Autonomous Function<br/>Check List Change</b> | <b>OC</b>   | <b>0.325</b>   | <b>0.166</b>                     | <b>0.243</b>                     | <b>0.903</b>                        |
|                                                  | <b>LOCF</b> | <b>0.367</b>   | <b>0.145</b>                     | <b>0.498</b>                     | <b>0.490</b>                        |
| <b>Self Perception Profile<br/>Change</b>        | <b>OC</b>   | <b>0.875</b>   | <b>0.904</b>                     | <b>0.702</b>                     | <b>0.619</b>                        |
|                                                  | <b>LOCF</b> | <b>0.788</b>   | <b>0.711</b>                     | <b>0.489</b>                     | <b>0.761</b>                        |
| <b>Sickness Impact<br/>Profile Change</b>        | <b>OC</b>   | <b>0.244</b>   | <b>0.752</b>                     | <b>0.070</b>                     | <b>0.191</b>                        |
|                                                  | <b>LOCF</b> | <b>0.233</b>   | <b>0.504</b>                     | <b>0.055</b>                     | <b>0.302</b>                        |

**Analysis of Variance** - with Treatment and Site Effects in the model

**Logistical Regression** - with Treatment and Site Effects in the model

**OC** – Observed Cases

**LOCF** – Last Observation Carried Forward

**Note** - All p values uncorrected for multiple variable sampling

**Table B – Additional AEs found during review of 93 CRFs (acute phase plus taper)**

| SOC Type         | Paroxetine<br>(n=31) | Imipramine<br>(n=40) | Placebo<br>(n=22) |
|------------------|----------------------|----------------------|-------------------|
| Cardiovascular   | 0                    | 5                    | 0                 |
| Gastrointestinal | 4                    | 4                    | 2                 |
| Psychiatric      | 12                   | 1                    | 4                 |
| Respiratory      | 0                    | 1                    | 1                 |
| Other            | 7                    | 6                    | 3                 |
| <b>Total</b>     | <b>23</b>            | <b>17</b>            | <b>10</b>         |

**Table C – Breakdown of new adverse events found during CRF review by System Organ Class (SOC) (MedDRA)**

| SOC                                                         | Adverse Event               | Paroxetine<br>N=31         | Imipramine<br>N=40         | Placebo<br>n=22            |
|-------------------------------------------------------------|-----------------------------|----------------------------|----------------------------|----------------------------|
|                                                             |                             | No. found in<br>CRF review | No. found in<br>CRF review | No. found in<br>CRF review |
| <b>Psychiatric disorders</b>                                | Suicidal ideation           | 2                          | 0                          | 1                          |
|                                                             | Feelings of hopelessness    | 1                          | 0                          | 0                          |
|                                                             | Self harm/suicidal gesture  | 1                          | 0                          | 0                          |
|                                                             | Depression worsening        | 2                          | 0                          | 1                          |
|                                                             | Psychosis                   | 1                          | 0                          | 0                          |
|                                                             | Increased anger/aggression  | 1                          | 0                          | 0                          |
|                                                             | Insomnia                    | 1                          | 0                          | 0                          |
|                                                             | Agitation                   | 1                          | 0                          | 0                          |
|                                                             | Somnolence                  | 0                          | 0                          | 0                          |
|                                                             | Nervousness                 | 0                          | 1                          | 0                          |
|                                                             | Decreased concentration     | 0                          | 0                          | 1                          |
|                                                             | Mutism/soft speech          | 2                          | 0                          | 0                          |
|                                                             | Increased anxiety           | 0                          | 0                          | 1                          |
| <b>Total</b>                                                |                             | <b>12</b>                  | <b>1</b>                   | <b>4</b>                   |
| <b>Gastrointestinal disorders</b>                           | Nausea                      | 1                          | 1                          | 2                          |
|                                                             | Gastrointestinal complaints | 1                          | 0                          | 0                          |
|                                                             | Increased sickness          | 1                          | 0                          | 0                          |
|                                                             | Diarrhoea                   | 1                          | 1                          | 0                          |
|                                                             | Vomiting                    | 0                          | 1                          | 0                          |
|                                                             | Heartburn                   | 0                          | 1                          | 0                          |
|                                                             | <b>Total</b>                | <b>4</b>                   | <b>4</b>                   | <b>2</b>                   |
| <b>Metabolism and nutrition disorders</b>                   | Loss of appetite            | 1                          | 0                          | 0                          |
|                                                             | Weight loss                 | 2                          | 0                          | 0                          |
|                                                             | Dehydration                 | 0                          | 1                          | 0                          |
|                                                             | <b>Total</b>                | <b>3</b>                   | <b>1</b>                   | <b>0</b>                   |
| <b>Musculoskeletal and connective tissue disorders</b>      | Neck pain                   | 0                          | 0                          | 1                          |
|                                                             | Joint pain                  | 0                          | 0                          | 1                          |
|                                                             | <b>Total</b>                | <b>0</b>                   | <b>0</b>                   | <b>2</b>                   |
| <b>General disorders and administration site conditions</b> | Fatigue                     | 4                          | 1                          | 0                          |
|                                                             | Body shakes                 | 0                          | 1                          | 0                          |
|                                                             | Fever                       | 0                          | 0                          | 1                          |
|                                                             | <b>Total</b>                | <b>4</b>                   | <b>4</b>                   | <b>1</b>                   |
| <b>Nervous systems disorders</b>                            | Headache                    | 0                          | 2                          | 0                          |
|                                                             | <b>Total</b>                | <b>0</b>                   | <b>2</b>                   | <b>0</b>                   |
| <b>Respiratory, thoracic and mediastinal disorders</b>      | Chest congestion            | 0                          | 1                          | 0                          |
|                                                             | Cough                       | 0                          | 0                          | 1                          |
|                                                             | <b>Total</b>                | <b>0</b>                   | <b>1</b>                   | <b>1</b>                   |
| <b>Cardiac disorders</b>                                    | Tachycardia                 | 0                          | 0                          | 0                          |
|                                                             | Dizziness                   | 0                          | 3                          | 0                          |
|                                                             | Low systolic BP             | 0                          | 1                          | 0                          |
|                                                             | High BP                     | 0                          | 1                          | 0                          |
|                                                             | <b>Total</b>                | <b>0</b>                   | <b>5</b>                   | <b>0</b>                   |
| <b>Skin and subcutaneous tissue disorders</b>               | Sweating                    | 0                          | 1                          | 0                          |
|                                                             | <b>Total</b>                | <b>0</b>                   | <b>1</b>                   | <b>0</b>                   |
| <b>Total Psychiatric disorders</b>                          |                             | <b>12</b>                  | <b>1</b>                   | <b>4</b>                   |
| <b>TOTAL ALL OTHER AES</b>                                  |                             | <b>11</b>                  | <b>16</b>                  | <b>6</b>                   |
| <b>GRAND TOTAL</b>                                          |                             | <b>23</b>                  | <b>17</b>                  | <b>10</b>                  |

NB. All AEs found for the paroxetine and imipramine patients were reported during the acute phase. For the placebo group, 2 additional AEs ('depression worsening' & 'increased irritability') were found during the continuation phase.

**Table D – Summary of all adverse events within each SOC, including those classed as ‘Severe’ by investigator**

| SOC                                             | Paroxetine<br>N=93           |                        | Imipramine<br>N=95           |                        | Placebo<br>N=87              |                        |
|-------------------------------------------------|------------------------------|------------------------|------------------------------|------------------------|------------------------------|------------------------|
|                                                 | No. AEs reported (CSR check) | No. reported as SEVERE | No. AEs reported (CSR check) | No. reported as SEVERE | No. AEs reported (CSR check) | No. reported as SEVERE |
| Cardiac and vascular disorders                  | 44                           | 1 (2.3%)               | 130                          | 3 (2.3%)               | 32                           | 0                      |
| Gastrointestinal disorders                      | 112                          | 25 (22.3%)             | 147                          | 20 (13.6%)             | 79                           | 4 (5.1%)               |
| Psychiatric disorders                           | 103                          | 32 (31.1%)             | 63                           | 4 (6.3%)               | 24                           | 6 (25%)                |
| Nervous system disorders                        | 101                          | 7 (6.9%)               | 114                          | 14 (12.3%)             | 77                           | 7 (9.1%)               |
| Respiratory, thoracic and mediastinal disorders | 42                           | 2 (4.8%)               | 22                           | 1 (4.5%)               | 39                           | 4 (10.3%)              |
| General disorders                               | 15                           | 2 (13.3%)              | 10                           | 1 (10.0%)              | 17                           | 1 (5.9%)               |
| Skin and subcutaneous tissue disorders          | 10                           | 0                      | 17                           | 1 (5.9%)               | 10                           | 1 (10%)                |
| Renal and urinary disorders                     | 5                            | 0                      | 9                            | 1 (11.1%)              | 4                            | 0                      |
| Immune system disorders                         | 2                            | 0                      | 2                            | 0                      | 3                            | 0                      |
| Endocrine disorders                             | 1                            | 0                      | 1                            | 1 (100%)               | 1                            | 0                      |
| Blood and lymphatic disorders                   | 1                            | 0                      | 4                            | 0                      | 3                            | 0                      |
| Musculoskeletal and connective tissue disorders | 8                            | 0                      | 7                            | 0                      | 16                           | 0                      |
| Reproductive system and breast disorder         | 4                            | 0                      | 4                            | 1 (25%)                | 4                            | 1 (25%)                |
| Infections                                      | 6                            | 1 (16.7%)              | 5                            | 1 (20%)                | 4                            | 1 (25%)                |
| Eye disorders                                   | 5                            | 0                      | 4                            | 0                      | 1                            | 0                      |
| Metabolism and nutritional disorders            | 17                           | 0                      | 6                            | 0                      | 10                           | 1 (10%)                |
| Ear and labyrinth Disorders                     | 1                            | 0                      | 0                            | -                      | 0                            | -                      |
| Injuries, poisoning & procedural complications  | 3                            | 0                      | 3                            | 1 (33.3%)              | 6                            | 0                      |
| Pregnancy, puerperium and perinatal conditions  | 0                            | -                      | 2                            | 1 (50%)                | 0                            | -                      |
| Surgical and medical procedures                 | 1                            | 0                      | 2                            | 0                      | 0                            | -                      |
| <b>TOTAL NUMBER OF AEs</b>                      | <b>481</b>                   | <b>70 (14.6%)</b>      | <b>552</b>                   | <b>50 (9.1%)</b>       | <b>330</b>                   | <b>26 (7.9%)</b>       |

**Table E – Full breakdown of all adverse events within each SOC, including those classed as ‘Severe’ by investigator – events from CSR check only**

| SOC                                   | MedDRA preferred term             | Paroxetine<br>N=93           |                        | Imipramine<br>N=95           |                        | Placebo<br>N=87              |                        |
|---------------------------------------|-----------------------------------|------------------------------|------------------------|------------------------------|------------------------|------------------------------|------------------------|
|                                       |                                   | No. AEs reported (CSR check) | No. reported as Severe | No. AEs reported (CSR check) | No. reported as Severe | No. AEs reported (CSR check) | No. reported as Severe |
| <b>Cardiac and vascular disorders</b> | Arrhythmia                        | 0                            | -                      | 1                            | 0                      | 1                            | 0                      |
|                                       | Atrial ectopic                    | 0                            | -                      | 0                            | -                      | 1                            | 0                      |
|                                       | AV block                          | 1                            | 0                      | 2                            | 0                      | 2                            | 0                      |
|                                       | Bradycardia                       | 0                            | -                      | 1                            | 0                      | 1                            | 0                      |
|                                       | Bundle branch block               | 0                            | -                      | 1                            | 0                      | 1                            | 0                      |
|                                       | Chest pain                        | 2                            | 1                      | 5                            | 1                      | 2                            | 0                      |
|                                       | Dizziness                         | 35                           | 0                      | 57                           | 1                      | 18                           | 0                      |
|                                       | ECG/ T-ECG abnormal               | 0                            | -                      | 7                            | 0                      | 2                            | 0                      |
|                                       | Hot flush                         | 0                            | -                      | 6                            | 0                      | 2                            | 0                      |
|                                       | Postural hypotension/ hypotension | 3                            | 0                      | 17                           | 0                      | 1                            | 0                      |
|                                       | QT interval prolonged             | 0                            | -                      | 3                            | 0                      | 0                            | -                      |
|                                       | Tachycardia                       | 3                            | 0                      | 28                           | 1                      | 1                            | 0                      |
|                                       | Hypertension                      | 0                            | -                      | 2                            | 0                      | 0                            | -                      |
| <b>TOTAL</b>                          |                                   | <b>44</b>                    | <b>1</b>               | <b>130</b>                   | <b>3</b>               | <b>32</b>                    | <b>0</b>               |
| <b>Gastrointestinal disorders</b>     | Abdominal pain                    | 0                            | -                      | 0                            | -                      | 2                            | 0                      |
|                                       | Constipation                      | 7                            | 0                      | 10                           | 2                      | 4                            | 0                      |
|                                       | Cramps                            | 14                           | 1                      | 11                           | 0                      | 14                           | 0                      |
|                                       | Diarrhea                          | 12                           | 6                      | 8                            | 3                      | 9                            | 0                      |
|                                       | Dry Mouth                         | 20                           | 0                      | 48                           | 2                      | 12                           | 1                      |
|                                       | Dyspepsia/ heartburn              | 8                            | 0                      | 12                           | 0                      | 4                            | 0                      |
|                                       | Food poisoning                    | 1                            | 0                      | 0                            | -                      | 1                            | 1                      |
|                                       | Gastroenteritis/ GI complaints    | 0                            | -                      | 1                            | 1                      | 0                            | -                      |
|                                       | Nausea/ sickness                  | 37                           | 10                     | 43                           | 5                      | 27                           | 2                      |
|                                       | Reflux                            | 1                            | 0                      | 0                            | -                      | 0                            | -                      |
|                                       | Retching                          | 0                            | -                      | 1                            | 0                      | 0                            | -                      |
|                                       | Sores                             | 0                            | -                      | 0                            | -                      | 1                            | 0                      |
|                                       | Stomatitis                        | 0                            | -                      | 2                            | 2                      | 0                            | -                      |
|                                       | Ulcer                             | 1                            | 1                      | 0                            | 0                      | 0                            | 0                      |
|                                       | Vomiting                          | 11                           | 7                      | 11                           | 5                      | 5                            | 0                      |
| <b>TOTAL</b>                          |                                   | <b>112</b>                   | <b>25</b>              | <b>147</b>                   | <b>20</b>              | <b>79</b>                    | <b>4</b>               |
| <b>Psychiatric disorders</b>          | Abnormal dreams                   | 3                            | 0                      | 5                            | 0                      | 2                            | 0                      |
|                                       | Aggravated depression             | 5                            | 3                      | 3                            | 0                      | 2                            | 2                      |
|                                       | Aggression/ increased anger       | 7                            | 3                      | 3                            | 2                      | 0                            | -                      |
|                                       | Agitation                         | 1                            | -                      | 1                            | 0                      | 0                            | -                      |
|                                       | Akathisia                         | 18                           | 1                      | 12                           | 1                      | 8                            | 0                      |
|                                       | Anorgasmia                        | 1                            | 1                      | 0                            | -                      | 0                            | -                      |
|                                       | Anxiety                           | 2                            | 1                      | 0                            | -                      | 1                            | 1                      |
|                                       | Concentration low                 | 2                            | 0                      | 1                            | 0                      | 0                            | -                      |

|                                                             |                            |            |           |            |           |           |          |
|-------------------------------------------------------------|----------------------------|------------|-----------|------------|-----------|-----------|----------|
|                                                             | Depersonalisation          | 0          | -         | 1          | 0         | 1         | 0        |
|                                                             | Disinhibition              | 4          | 3         | 1          | 0         | 2         | 1        |
|                                                             | Drug withdrawal syndrome   | 2          | 1         | 0          | -         | 0         | -        |
|                                                             | Hallucinations             | 1          | 1         | 1          | 1         | 0         | -        |
|                                                             | Hopelessness (feelings of) | 0          | -         | 0          | -         | 0         | -        |
|                                                             | Impulsive behaviour        | 1          | -         | 0          | -         | 0         | -        |
|                                                             | Insomnia                   | 16         | 2         | 14         | 0         | 4         | 1        |
|                                                             | Nervousness                | 0          | -         | 0          | -         | 0         | -        |
|                                                             | Paranoia                   | 1          | 0         | 0          | -         | 0         | -        |
|                                                             | Psychosis                  | 1          | 1         | 0          | -         | 0         | -        |
|                                                             | Somnolence                 | 24         | 6         | 14         | 0         | 3         | 0        |
|                                                             | Substance abuse            | 1          | 1         | 1          | 0         | 0         | -        |
|                                                             | Suicidal ideation/gesture  | 5          | 4         | 3          | 0         | 1         | 1        |
|                                                             | Suicide attempt            | 8          | 4         | 3          | 0         | 0         | -        |
|                                                             | <b>TOTAL</b>               | <b>103</b> | <b>32</b> | <b>63</b>  | <b>4</b>  | <b>24</b> | <b>6</b> |
|                                                             |                            |            |           |            |           |           |          |
| <b>Nervous system disorders</b>                             | Bad taste                  | 0          | -         | 3          | 0         | 0         | -        |
|                                                             | Convulsion                 | 0          | -         | 1          | 1         | 0         | -        |
|                                                             | Dystonia                   | 5          | 0         | 7          | 0         | 3         | 0        |
|                                                             | Headache                   | 59         | 3         | 59         | 9         | 56        | 4        |
|                                                             | Laryngitis                 | 1          | 0         | 0          | -         | 0         | -        |
|                                                             | Memory loss                | 0          | -         | 1          | 0         | 0         | -        |
|                                                             | Migraine                   | 1          | 0         | 1          | 1         | 0         | -        |
|                                                             | Myoclonus                  | 4          | 1         | 1          | 0         | 0         | -        |
|                                                             | Paresthesia                | 1          | 0         | 1          | 0         | 0         | -        |
|                                                             | Sore throat                | 10         | 1         | 12         | 1         | 11        | 2        |
|                                                             | Tics                       | 1          | 0         | 1          | 0         | 0         | -        |
|                                                             | Tinnitus                   | 0          | -         | 2          | 0         | 0         | -        |
|                                                             | Toothache                  | 6          | 1         | 0          | -         | 3         | 1        |
|                                                             | Tremor                     | 11         | 1         | 20         | 1         | 2         | 0        |
|                                                             | Vision blurred             | 2          | 0         | 5          | 1         | 2         | 0        |
|                                                             | <b>TOTAL</b>               | <b>101</b> | <b>7</b>  | <b>114</b> | <b>14</b> | <b>77</b> | <b>7</b> |
|                                                             |                            |            |           |            |           |           |          |
| <b>Respiratory, thoracic and mediastinal disorders</b>      | Chest cold/congestion      | 11         | 1         | 6          | 0         | 14        | 1        |
|                                                             | Coughing                   | 6          | 0         | 4          | 0         | 6         | 0        |
|                                                             | Dyspnea                    | 3          | 1         | 5          | 1         | 2         | 0        |
|                                                             | Epistaxis                  | 1          | 0         | 1          | 0         | 0         | -        |
|                                                             | Nasopharyngitis            | 3          | 0         | 0          | -         | 1         | 0        |
|                                                             | Respiratory disorder       | 0          | -         | 0          | -         | 2         | 0        |
|                                                             | Rhinitis                   | 10         | 0         | 3          | 0         | 5         | 1        |
|                                                             | Sinusitis                  | 8          | 0         | 3          | 0         | 8         | 2        |
|                                                             | Sneezing                   | 0          | -         | 0          | -         | 1         | 0        |
|                                                             | <b>TOTAL</b>               | <b>42</b>  | <b>2</b>  | <b>22</b>  | <b>1</b>  | <b>39</b> | <b>4</b> |
|                                                             |                            |            |           |            |           |           |          |
| <b>General disorders and administration site conditions</b> | Body Shakes                | 0          | -         | 0          | -         | 0         | -        |
|                                                             | Fatigue                    | 15         | 2         | 8          | 1         | 11        | 1        |
|                                                             | Fever                      | 0          | -         | 2          | 0         | 4         | 0        |
|                                                             | Pain                       | 0          | -         | 0          | -         | 2         | 0        |
|                                                             | <b>TOTAL</b>               | <b>15</b>  | <b>2</b>  | <b>10</b>  | <b>1</b>  | <b>17</b> | <b>1</b> |
|                                                             |                            |            |           |            |           |           |          |
| <b>Skin and subcutaneous tissue disorders</b>               | Acne                       | 3          | 0         | 2          | 0         | 1         | 0        |
|                                                             | Dermatitis                 | 1          | 0         | 2          | 0         | 1         | 0        |
|                                                             | Itchy                      | 0          | -         | 1          | 0         | 1         | 1        |
|                                                             | Rash                       | 4          | 0         | 5          | 1         | 4         | 0        |

|                                                        |                     |           |          |           |          |           |          |
|--------------------------------------------------------|---------------------|-----------|----------|-----------|----------|-----------|----------|
|                                                        | Scabies             | 0         | -        | 0         | -        | 1         | 0        |
|                                                        | Sweating            | 2         | 0        | 7         | 0        | 1         | 0        |
|                                                        | Syncope             | 0         | -        | 0         | -        | 1         | 0        |
|                                                        | <b>TOTAL</b>        | <b>10</b> | <b>0</b> | <b>17</b> | <b>1</b> | <b>10</b> | <b>1</b> |
| <b>Renal and urinary disorders</b>                     | Albuminuria         | 0         | -        | 0         | -        | 4         | 0        |
|                                                        | Cystitis            | 1         | 0        | 0         | -        | 0         | -        |
|                                                        | Nocturia            | 0         | -        | 1         | 0        | 0         | -        |
|                                                        | Polyuria            | 0         | -        | 1         | 0        | 0         | -        |
|                                                        | Pyuria              | 0         | -        | 1         | 0        | 0         | -        |
|                                                        | Urinary abnormality | 3         | 0        | 0         | -        | 0         | -        |
|                                                        | Urinary retention   | 0         | -        | 6         | 1        | 0         | -        |
|                                                        | UTI                 | 1         | 0        | 0         | -        | 0         | -        |
|                                                        | <b>TOTAL</b>        | <b>5</b>  | <b>0</b> | <b>9</b>  | <b>1</b> | <b>4</b>  | <b>0</b> |
| <b>Immune system disorders</b>                         | Allergy             | 1         | 0        | 1         | 0        | 3         | 0        |
|                                                        | Urticaria           | 1         | 0        | 1         | 0        | 0         | -        |
|                                                        | <b>TOTAL</b>        | <b>2</b>  | <b>0</b> | <b>2</b>  | <b>0</b> | <b>3</b>  | <b>0</b> |
| <b>Endocrine disorders</b>                             | Amenorrhea          | 1         | 0        | 0         | -        | 0         | -        |
|                                                        | Hyperglycemia       | 0         | -        | 1         | 1        | 1         | 0        |
|                                                        | <b>TOTAL</b>        | <b>1</b>  | <b>0</b> | <b>1</b>  | <b>1</b> | <b>1</b>  | <b>0</b> |
| <b>Blood and lymphatic disorders</b>                   | Anaemia             | 1         | 0        | 1         | 0        | 0         | -        |
|                                                        | Eosinophilia        | 0         | -        | 1         | 0        | 1         | 0        |
|                                                        | Leukopenia          | 0         | -        | 2         | 0        | 0         | -        |
|                                                        | Lymphadenopathy     | 0         | -        | 0         | -        | 1         | 0        |
|                                                        | Thrombocytopenia    | 0         | -        | 0         | -        | 1         | 0        |
|                                                        | <b>TOTAL</b>        | <b>1</b>  | <b>0</b> | <b>4</b>  | <b>0</b> | <b>3</b>  | <b>0</b> |
| <b>Musculoskeletal and connective tissue disorders</b> | Arthralgia          | 1         | 0        | 1         | 0        | 4         | 0        |
|                                                        | Back pain           | 5         | 0        | 2         | 0        | 10        | 0        |
|                                                        | Chills              | 0         | -        | 3         | 0        | 0         | -        |
|                                                        | Myalgia             | 2         | 0        | 1         | 0        | 2         | 0        |
|                                                        | <b>TOTAL</b>        | <b>8</b>  | <b>0</b> | <b>7</b>  | <b>0</b> | <b>16</b> | <b>0</b> |
| <b>Reproductive system and breast disorder</b>         | Breast enlargement  | 1         | 0        | 0         | -        | 0         | -        |
|                                                        | Dysmenorrhea        | 3         | 0        | 4         | 1        | 4         | 1        |
|                                                        | <b>TOTAL</b>        | <b>4</b>  | <b>0</b> | <b>4</b>  | <b>1</b> | <b>4</b>  | <b>1</b> |
| <b>Infections</b>                                      | Herpes zoster       | 0         | -        | 0         | -        | 1         | 0        |
|                                                        | Infection           | 4         | 0        | 3         | 1        | 3         | 1        |
|                                                        | Otitis media        | 2         | 1        | 2         | 0        | 0         | -        |
|                                                        | <b>TOTAL</b>        | <b>6</b>  | <b>1</b> | <b>5</b>  | <b>1</b> | <b>4</b>  | <b>1</b> |
| <b>Eye disorders</b>                                   | Conjunctivitis      | 2         | 0        | 0         | -        | 1         | 0        |
|                                                        | Itchy eyes          | 2         | 0        | 1         | 0        | 0         | -        |
|                                                        | Mydriasis           | 0         | -        | 1         | 0        | 0         | -        |
|                                                        | Photosensitivity    | 1         | 0        | 1         | 0        | 0         | -        |
|                                                        | Photopsia           | 0         | -        | 1         | 0        | 0         | -        |
|                                                        | <b>TOTAL</b>        | <b>5</b>  | <b>0</b> | <b>4</b>  | <b>0</b> | <b>1</b>  | <b>0</b> |
| <b>Metabolism and nutritional disorders</b>            | Decreased appetite  | 9         | 0        | 2         | 0        | 4         | 0        |
|                                                        | Dehydration         | 0         | -        | 0         | -        | 0         | -        |
|                                                        | Increased appetite  | 4         | 0        | 1         | 0        | 1         | 0        |
|                                                        | Thirst              | 0         | -        | 2         | 0        | 3         | 0        |



|                                                         |                  |                  |                   |                  |                   |                  |                   |
|---------------------------------------------------------|------------------|------------------|-------------------|------------------|-------------------|------------------|-------------------|
|                                                         | Weight gain      | 2                | 0                 | 0                | -                 | 0                | -                 |
|                                                         | Weight loss      | 2                | 0                 | 1                | 0                 | 2                | 1                 |
|                                                         | <b>TOTAL</b>     | <b>17</b>        | <b>0</b>          | <b>6</b>         | <b>0</b>          | <b>10</b>        | <b>1</b>          |
|                                                         |                  |                  |                   |                  |                   |                  |                   |
| <b>Ear and labyrinth disorders</b>                      | Ear pain         | 1                | 0                 | 0                | -                 | 0                | -                 |
|                                                         | <b>TOTAL</b>     | <b>1</b>         | <b>0</b>          | <b>0</b>         | <b>-</b>          | <b>0</b>         | <b>-</b>          |
|                                                         |                  |                  |                   |                  |                   |                  |                   |
| <b>Injuries, poisoning and procedural complications</b> | Head injury      | 0                | -                 | 1                | 0                 | 0                | -                 |
|                                                         | Overdose         | 0                | -                 | 1                | 1                 | 0                | -                 |
|                                                         | Trauma           | 3                | 0                 | 1                | 0                 | 6                | 0                 |
|                                                         | <b>TOTAL</b>     | <b>3</b>         | <b>0</b>          | <b>3</b>         | <b>1</b>          | <b>6</b>         | <b>0</b>          |
|                                                         |                  |                  |                   |                  |                   |                  |                   |
| <b>Pregnancy, puerperium and perinatal conditions</b>   | Pregnancy        | 0                | -                 | 2                | 1                 | 0                | -                 |
|                                                         | <b>TOTAL</b>     | <b>0</b>         | <b>-</b>          | <b>2</b>         | <b>1</b>          | <b>0</b>         | <b>-</b>          |
|                                                         |                  |                  |                   |                  |                   |                  |                   |
| <b>Surgical and medical procedures</b>                  | Tooth extraction | 1                | 0                 | 2                | 0                 | 0                | -                 |
|                                                         | <b>TOTAL</b>     | <b>1</b>         | <b>0</b>          | <b>2</b>         | <b>0</b>          | <b>0</b>         | <b>-</b>          |
|                                                         |                  |                  |                   |                  |                   |                  |                   |
|                                                         |                  | <b>Total AEs</b> | <b>TOTAL SAEs</b> | <b>Total AEs</b> | <b>TOTAL SAEs</b> | <b>Total AEs</b> | <b>TOTAL SAEs</b> |
| <b>TOTAL NUMBER OF AEs</b>                              |                  | <b>481</b>       | <b>70 (14.6%)</b> | <b>552</b>       | <b>50 (9.1%)</b>  | <b>330</b>       | <b>26 (7.9%)</b>  |

**Table F – Summary of adverse events during taper phase only**

| SOC                                                  | Paroxetine<br>N=19           |                        | Imipramine<br>N=32           |                        | Placebo<br>N=9               |                        |
|------------------------------------------------------|------------------------------|------------------------|------------------------------|------------------------|------------------------------|------------------------|
|                                                      | No. AEs reported (CSR check) | No. reported as Severe | No. AEs reported (CSR check) | No. reported as Severe | No. AEs reported (CSR check) | No. reported as Severe |
| Cardiac and vascular Disorders                       | 4                            | 0                      | 9                            | 0                      | 0                            | 0                      |
| Gastrointestinal Disorders                           | 9                            | 4                      | 18                           | 4                      | 4                            | 0                      |
| Psychiatric Disorders                                | 15                           | 8                      | 2                            | 0                      | 1                            | 1                      |
| Nervous system Disorders                             | 7                            | 1                      | 9                            | 2                      | 0                            | 0                      |
| Respiratory, thoracic and mediastinal disorders      | 3                            | 0                      | 1                            | 0                      | 0                            | 0                      |
| General disorders and administration site conditions | 1                            | 0                      | 1                            | 0                      | 0                            | 0                      |
| Renal and urinary Disorders                          | 3                            | 0                      | 1                            | 0                      | 2                            | 0                      |
| Immune system disorders                              | 0                            | 0                      | 1                            | 0                      | 0                            | 0                      |
| Endocrine disorders                                  | 0                            | 0                      | 1                            | 1                      | 0                            | 0                      |
| Blood and lymphatic disorders                        | 1                            | 0                      | 2                            | 0                      | 1                            | 0                      |
| Musculoskeletal and connective tissue disorders      | 0                            | 0                      | 2                            | 0                      | 1                            | 0                      |
| Reproductive system and breast disorder              | 1                            | 0                      | 0                            | 0                      | 0                            | 0                      |
| Infections                                           | 0                            | 0                      | 1                            | 0                      | 0                            | 0                      |
| Metabolism and nutritional disorders                 | 3                            | 0                      | 0                            | 0                      | 1                            | 0                      |
| Injuries, poisoning and procedural complications     | 0                            | 0                      | 1                            | 1                      | 0                            | 0                      |
| Pregnancy, puerperium and perinatal conditions       | 0                            | 0                      | 1                            | 1                      | 0                            | 0                      |
|                                                      | <b>Total AEs</b>             | <b>TOTAL SAEs</b>      | <b>Total AEs</b>             | <b>TOTAL SAEs</b>      | <b>Total AEs</b>             | <b>TOTAL SAEs</b>      |
| <b>TOTAL NUMBER OF AEs</b>                           | <b>47</b>                    | <b>13</b>              | <b>50</b>                    | <b>9</b>               | <b>10</b>                    | <b>1</b>               |

**Table G – Breakdown of adverse events during taper phase only**

| SOC                                                    | MedDRA preferred term     | Paroxetine<br>N=19           |                        | Imipramine<br>N=32           |                        | Placebo<br>N=9               |                        |
|--------------------------------------------------------|---------------------------|------------------------------|------------------------|------------------------------|------------------------|------------------------------|------------------------|
|                                                        |                           | No. AEs reported (CSR check) | No. reported as Severe | No. AEs reported (CSR check) | No. reported as Severe | No. AEs reported (CSR check) | No. reported as Severe |
| <b>Cardiac and vascular disorders</b>                  | Arrhythmia                | 0                            | 0                      | 1                            | 0                      | 0                            | 0                      |
|                                                        | AV block                  | 1                            | 0                      | 0                            | 0                      | 0                            | 0                      |
|                                                        | Bradycardia               | 0                            | 0                      | 1                            | 0                      | 0                            | 0                      |
|                                                        | Chest pain                | 0                            | 0                      | 1                            | 0                      | 0                            | 0                      |
|                                                        | Dizziness                 | 3                            | 0                      | 2                            | 0                      | 0                            | 0                      |
|                                                        | ECG/ T-ECG abnormal       | 0                            | 0                      | 1                            | 0                      | 0                            | 0                      |
|                                                        | QT interval prolonged     | 0                            | 0                      | 1                            | 0                      | 0                            | 0                      |
|                                                        | Tachycardia               | 0                            | 0                      | 2                            | 0                      | 0                            | 0                      |
|                                                        | <b>TOTAL</b>              | <b>4</b>                     | <b>0</b>               | <b>9</b>                     | <b>0</b>               | <b>0</b>                     | <b>0</b>               |
| <b>Gastrointestinal disorders</b>                      | Constipation              | 1                            | 0                      | 2                            | 0                      | 0                            | 0                      |
|                                                        | Dry mouth                 | 0                            | 0                      | 1                            | 0                      | 0                            | 0                      |
|                                                        | Diarrhea                  | 0                            | 0                      | 2                            | 0                      | 0                            | 0                      |
|                                                        | Dysepsia                  | 0                            | 0                      | 3                            | 0                      | 0                            | 0                      |
|                                                        | Cramps                    | 1                            | 0                      | 0                            | 0                      | 1                            | 0                      |
|                                                        | Gastroenteritis           | 0                            | 0                      | 1                            | 1                      | 0                            | 0                      |
|                                                        | Nausea/ sickness          | 4                            | 2                      | 6                            | 1                      | 1                            | 0                      |
|                                                        | Sores                     | 0                            | 0                      | 0                            | 0                      | 1                            |                        |
|                                                        | Ulcer                     | 1                            | 1                      | 0                            | 0                      | 0                            | 0                      |
|                                                        | Vomiting                  | 2                            | 1                      | 3                            | 2                      | 1                            | 0                      |
|                                                        | <b>TOTAL</b>              | <b>9</b>                     | <b>4</b>               | <b>18</b>                    | <b>4</b>               | <b>4</b>                     | <b>0</b>               |
| <b>Psychiatric disorders</b>                           | Aggravated depression     | 0                            | 0                      | 0                            | 0                      | 1                            | 1                      |
|                                                        | Aggression                | 2                            | 2                      | 0                            | 0                      | 0                            | 0                      |
|                                                        | Akathisia                 | 2                            | 1                      | 1                            | 0                      | 0                            | 0                      |
|                                                        | Concentration low         | 1                            | 0                      | 0                            | 0                      | 0                            | 0                      |
|                                                        | Drug withdrawal syndrome  | 2                            | 1                      | 0                            | 0                      | 0                            | 0                      |
|                                                        | Insomnia                  | 1                            | 0                      | 0                            | 0                      | 0                            | 0                      |
|                                                        | Paranoia                  | 1                            | 0                      | 0                            | 0                      | 0                            | 0                      |
|                                                        | Somnolence                | 1                            | 0                      | 0                            | 0                      | 0                            | 0                      |
|                                                        | Substance abuse           | 1                            | 1                      | 0                            | 0                      | 0                            | 0                      |
|                                                        | Suicidal ideation/gesture | 2                            | 2                      | 1                            | 0                      | 0                            | 0                      |
| Suicide attempt                                        | 2                         | 1                            | 0                      | 0                            | 0                      | 0                            |                        |
|                                                        | <b>TOTAL</b>              | <b>15</b>                    | <b>8</b>               | <b>2</b>                     | <b>0</b>               | <b>1</b>                     | <b>1</b>               |
| <b>Nervous system disorders</b>                        | Convulsion                | 0                            | 0                      | 1                            | 1                      | 0                            | 0                      |
|                                                        | Headache                  | 4                            | 1                      | 7                            | 1                      | 0                            | 0                      |
|                                                        | Sore throat               | 1                            | 0                      | 1                            | 0                      | 0                            | 0                      |
|                                                        | Tremor                    | 1                            | 0                      | 0                            | 0                      | 0                            | 0                      |
|                                                        | Vision blurred            | 1                            | 0                      | 0                            | 0                      | 0                            | 0                      |
|                                                        | <b>TOTAL</b>              | <b>7</b>                     | <b>1</b>               | <b>9</b>                     | <b>2</b>               | <b>0</b>                     | <b>0</b>               |
| <b>Respiratory, thoracic and mediastinal disorders</b> | Epistaxis                 | 1                            | 0                      | 0                            | 0                      | 0                            | 0                      |
|                                                        | Rhinitis                  | 2                            | 0                      | 0                            | 0                      | 0                            | 0                      |
|                                                        | Sinusitis                 | 0                            | 0                      | 1                            | 0                      | 0                            | 0                      |
|                                                        | <b>TOTAL</b>              | <b>3</b>                     | <b>0</b>               | <b>1</b>                     | <b>0</b>               | <b>0</b>                     | <b>0</b>               |

|                                                             |                     |                  |                   |                  |                   |                  |                   |
|-------------------------------------------------------------|---------------------|------------------|-------------------|------------------|-------------------|------------------|-------------------|
| <b>General disorders and site administration conditions</b> | Fatigue             | 1                | 0                 | 1                | 0                 | 0                | 0                 |
|                                                             | <b>TOTAL</b>        | <b>1</b>         | <b>0</b>          | <b>1</b>         | <b>0</b>          | <b>0</b>         | <b>0</b>          |
| <b>Renal and urinary disorders</b>                          | Albuminuria         | 0                | 0                 | 0                | 0                 | 2                | 0                 |
|                                                             | Pyuria              | 0                | 0                 | 1                | 0                 | 0                | 0                 |
|                                                             | Urinary abnormality | 2                | 0                 | 0                | 0                 | 0                | 0                 |
|                                                             | UTI                 | 1                | 0                 | 0                | 0                 | 0                | 0                 |
|                                                             | <b>TOTAL</b>        | <b>3</b>         | <b>0</b>          | <b>1</b>         | <b>0</b>          | <b>2</b>         | <b>0</b>          |
| <b>Immune system disorders</b>                              | Urticaria           | 0                | 0                 | 1                | 0                 | 0                | 0                 |
|                                                             | <b>TOTAL</b>        | <b>0</b>         | <b>0</b>          | <b>1</b>         | <b>0</b>          | <b>0</b>         | <b>0</b>          |
| <b>Endocrine disorders</b>                                  | Hyperglycemia       | 0                | 0                 | 1                | 1                 | 0                | 0                 |
|                                                             | <b>TOTAL</b>        | <b>0</b>         | <b>0</b>          | <b>1</b>         | <b>1</b>          | <b>0</b>         | <b>0</b>          |
| <b>Blood and lymph disorders</b>                            | Anaemia             | 1                | 0                 | 1                | 0                 | 0                | 0                 |
|                                                             | Eosinophilia        | 0                | 0                 | 1                | 0                 | 0                | 0                 |
|                                                             | Thrombocytopenia    | 0                | 0                 | 0                | 0                 | 1                | 0                 |
|                                                             | <b>TOTAL</b>        | <b>1</b>         | <b>0</b>          | <b>2</b>         | <b>0</b>          | <b>1</b>         | <b>0</b>          |
| <b>Musculoskeletal and connective tissue disorders</b>      | Arthralgia          | 0                | 0                 | 1                | 0                 | 0                | 0                 |
|                                                             | Back pain           | 0                | 0                 | 0                | 0                 | 1                | 0                 |
|                                                             | Myalgia             | 0                | 0                 | 1                | 0                 | 0                | 0                 |
|                                                             | <b>TOTAL</b>        | <b>0</b>         | <b>0</b>          | <b>2</b>         | <b>0</b>          | <b>1</b>         | <b>0</b>          |
| <b>Reproductive system and breast disorder</b>              | Dysmenorrhea        | 1                | 0                 | 0                | 0                 | 0                | 0                 |
|                                                             | <b>TOTAL</b>        | <b>1</b>         | <b>0</b>          | <b>0</b>         | <b>0</b>          | <b>0</b>         | <b>0</b>          |
| <b>Infections</b>                                           | Otitis media        | 0                | 0                 | 1                | 0                 | 0                | 0                 |
|                                                             | <b>TOTAL</b>        | <b>0</b>         | <b>0</b>          | <b>1</b>         | <b>0</b>          | <b>0</b>         | <b>0</b>          |
| <b>Metabolism and nutritional disorders</b>                 | Decreased appetite  | 0                | 0                 | 0                | 0                 | 1                | 0                 |
|                                                             | Increased appetite  | 1                | 0                 | 0                | 0                 | 0                | 0                 |
|                                                             | Weight gain         | 2                | 0                 | 0                | 0                 | 0                | 0                 |
|                                                             | <b>TOTAL</b>        | <b>3</b>         | <b>0</b>          | <b>0</b>         | <b>0</b>          | <b>1</b>         | <b>0</b>          |
| <b>Injuries, poisoning and procedural complications</b>     | Overdose            | 0                | 0                 | 1                | 1                 | 0                | 0                 |
|                                                             | <b>TOTAL</b>        | <b>0</b>         | <b>0</b>          | <b>1</b>         | <b>1</b>          | <b>0</b>         | <b>0</b>          |
| <b>Pregnancy, puerperium and perinatal conditions</b>       | Pregnancy           | 0                | 0                 | 1                | 1                 | 0                | 0                 |
|                                                             | <b>TOTAL</b>        | <b>0</b>         | <b>0</b>          | <b>1</b>         | <b>1</b>          | <b>0</b>         | <b>0</b>          |
|                                                             |                     | <b>Total AEs</b> | <b>TOTAL SAEs</b> | <b>Total AEs</b> | <b>TOTAL SAEs</b> | <b>Total AEs</b> | <b>TOTAL SAEs</b> |
| <b>TOTAL NUMBER OF AEs</b>                                  |                     | <b>47</b>        | <b>13</b>         | <b>50</b>        | <b>9</b>          | <b>10</b>        | <b>1</b>          |

**Table H – Changes to ‘reasons for discontinuation’ during acute (plus taper) phase**

**a) Paroxetine group**

TAPER PHASE: In total 67 patients completed the 8 week acute phase. Of these, 16 were discontinued at the 8 week visit. The proposed changes to the reasons for discontinuation are given for each below:

| Patient ID    | GSK reason for discontinuation    | Proposed reason for discontinuation | Notes                                                                                                                                                                                                                                                                                                                               |
|---------------|-----------------------------------|-------------------------------------|-------------------------------------------------------------------------------------------------------------------------------------------------------------------------------------------------------------------------------------------------------------------------------------------------------------------------------------|
| 329.001.00068 | Lack of Efficacy                  | Lack of Efficacy                    | Non-responder (HAM-D)                                                                                                                                                                                                                                                                                                               |
| 329.001.00206 | Lack of Efficacy                  | Lack of Efficacy                    | Non-responder (HAM-D)                                                                                                                                                                                                                                                                                                               |
| 329.003.00081 | Lack of Efficacy                  | OTHER (misc)                        | HAM-D scores indicate patient a ‘Responder’                                                                                                                                                                                                                                                                                         |
| 329.003.00089 | Lack of Efficacy                  | AE (suicidal)                       | SAE narrative: “the patient became agitated and said she would kill herself following threats of punishment from her mother to control her behavior. The patient was deemed at risk to herself and was brought to the crisis service. She was hospitalized... and the decision was made she would not enter the continuation phase. |
| 329.003.00248 | Lack of Efficacy                  | Lack of Efficacy                    | Abnormal blood around same time as down-titration- but investigator deemed ‘mild’ & ‘unrelated’. Experienced ‘severe’ withdrawal symptoms.                                                                                                                                                                                          |
| 329.003.00250 | AE (overdose)                     | AE (suicidal)                       | End of week 58 dose reduced, while patient was ‘waiting to start phase II meds’. During this interim period, patient was hospitalised for attempted suicide and subsequently withdrawn.                                                                                                                                             |
| 329.005.00258 | Other (going for general surgery) | Lost to FU                          | Patient eligible for continuation but scheduled for general surgery.                                                                                                                                                                                                                                                                |
| 329.005.00300 | Lack of Efficacy                  | Lost to FU                          | Patient never turned up for final visit during down titration (see page 222 of CRF)                                                                                                                                                                                                                                                 |
| 329.005.00336 | Other (no study meds)             | PV (investigator)                   | No meds                                                                                                                                                                                                                                                                                                                             |
| 329.008.00188 | PV (non compliance)               | PV (non compliance)                 | Migraine & Anxiety 9dys 48 & 52), ‘over-compliance 128%’ day 55.                                                                                                                                                                                                                                                                    |
| 329.009.00193 | Lack of Efficacy                  | Lack of Efficacy                    | Non-responder (HAM-D)                                                                                                                                                                                                                                                                                                               |
| 329.009.00196 | Withdrawn Consent                 | Withdrawn Consent                   | No acute phase conclusion page in CRF. Info from Appendix G                                                                                                                                                                                                                                                                         |

|               |                            |                            |                                                                                |
|---------------|----------------------------|----------------------------|--------------------------------------------------------------------------------|
| 329.009.00201 | AE (paranoia & aggression) | AE (paranoia & aggression) |                                                                                |
| 329.009.00324 | AE (rash)                  | AE (rash)                  |                                                                                |
| 329.009.00329 | Lack of Efficacy           | AE (depression worsening)  | Worsening of depression reported as AE just prior to initiating down titration |
| 329.012.00025 | Lack of Efficacy           | Lack of Efficacy           | Non-responder (HAM-D)                                                          |

**CRF REVIEW:** Out of 31 reviewed CRFs, 9 changes to reasons for withdrawal were proposed:

|                                      | Patient ID      | GSK reason for withdrawal (as per Appendix G) | RIAT reason for withdrawal                                                              |
|--------------------------------------|-----------------|-----------------------------------------------|-----------------------------------------------------------------------------------------|
| <b>Reason for withdrawal changes</b> | 329.001.00065   | AE (aggression)                               | AE (suicidal)                                                                           |
|                                      | 329.002.00058   | AE (overdose)                                 | AE (suicidal gesture/attempt) – OD (Tylenol x 80 pills) 3 days after discontinuing meds |
|                                      | 329.003.00313   | AE (hospitalisation)                          | AE (suicidal)                                                                           |
|                                      | 329.004.00015 * | Other (conflict with school and study)        | Withdrawn consent                                                                       |
|                                      | 329.004.00212   | PV (non compliance)                           | AE (sedation)                                                                           |
|                                      | 329.005.00333   | Lack of Efficacy                              | AE (suicidal)                                                                           |
|                                      | 329.009.00133   | Lost to Follow Up                             | Lack of Efficacy                                                                        |
|                                      | 329.011.00288   | Lack of Efficacy                              | AE (agitation, possibly suicidal)                                                       |
|                                      | 329.012.00228   | PV                                            | Withdrawn consent                                                                       |

In addition a further 8 participants of those reviewed, who were originally described as having withdrawn for 'AE including intercurrent illness' according to Appendix G, were further defined. These were as follows:

|                                       | Patient ID      | GSK reason for withdrawal (as per Appendix G) | RIAT reason for withdrawal       |
|---------------------------------------|-----------------|-----------------------------------------------|----------------------------------|
| <b>Adverse Events further defined</b> | 329.001.00063   | AE inc intercurrent illness                   | AE (mania)                       |
|                                       | 329.002.00058   | AE inc intercurrent illness                   | AE (suicidal)                    |
|                                       | 329.002.00245   | AE inc intercurrent illness                   | AE (intentional overdose)        |
|                                       | 329.003.00250 * | AE inc intercurrent illness                   | AE (suicidal)                    |
|                                       | 329.005.00011 * | AE inc intercurrent illness                   | AE (suicidal)                    |
|                                       | 329.005.00152   | AE inc intercurrent illness                   | AE (GI – nausea/vomit/diarrhoea) |
|                                       | 329.009.00240   | AE inc intercurrent illness                   | AE (worsening depression)        |
|                                       | 329.012.00226   | AE inc intercurrent illness                   | AE (cardiac)                     |

\* withdrawn during CONTINUATION phase

## **b) Imipramine group**

**TAPER PHASE:** In total 56 patients completed the 8 week acute phase. Of these, 17 were discontinued at the 8 week visit. Proposed changes to the 'reasons for discontinuation' (if any) for these patients are given below:

| <b>Patient ID</b> | <b>GSK reason for discontinuation</b> | <b>Proposed reason for discontinuation</b> | <b>Notes</b>                                                                                                                             |
|-------------------|---------------------------------------|--------------------------------------------|------------------------------------------------------------------------------------------------------------------------------------------|
| 329.002.00098     | Lack of Efficacy                      | Adverse Event (dry mouth)                  | Patient reported ongoing 'dry mouth' and 'tremor'. Note on pages 222 and 226 showing a dose reduction/ down titration due to these AEs.  |
| 329.002.00244     | Lack of Efficacy                      | PV (investigator)                          | Week 8 meds unavailable. (p250)                                                                                                          |
| 329.003.00090     | Lack of Efficacy                      | Lack of Efficacy                           | Non-responder (HAM-D)                                                                                                                    |
| 329.003.00249     | Lack of Efficacy                      | Lack of Efficacy                           | Non-responder (HAM-D)                                                                                                                    |
| 329.003.00314     | PV non compliance                     | PV non compliance                          |                                                                                                                                          |
| 329.003.00317     | Lack of Efficacy                      | Lack of Efficacy                           | Non-responder (HAM-D)                                                                                                                    |
| 329.005.00009     | Lack of Efficacy                      | Lack of Efficacy                           | Non-responder (HAM-D)                                                                                                                    |
| 329.005.00117     | Lack of Efficacy                      | Other (misc)                               | HAM-D scores indicate patient a 'Responder'                                                                                              |
| 329.005.00255     | Lack of Efficacy                      | Lack of Efficacy                           | Non-responder (HAM-D)                                                                                                                    |
| 329.005.00295     | Adverse Event (homicidal)             | Adverse Event (homicidal)                  | Wanted to kill parents                                                                                                                   |
| 329.005.00332     | Lack of Efficacy                      | Lack of Efficacy                           | Non-responder (HAM-D)                                                                                                                    |
| 329.005.00335     | Lack of Efficacy                      | Lack of Efficacy                           | Non-responder (HAM-D)                                                                                                                    |
| 329.008.00187     | Lack of Efficacy                      | AE (tachycardia)                           | Pt experiencing 'persistent side effects' at time of withdrawal (p222), including pulse rate >110 for 2 consecutive weeks.               |
| 329.009.00134     | AE (tachycardia/ inc QT/ QTc)         | AE (tachycardia/ inc QT/ QTc)              |                                                                                                                                          |
| 329.009.00137     | Other (ADHD)                          | PV (investigator)                          | 'Team felt due to continuing ADHD symptoms pt needed treatment with stimulant'. Patient had 'severe' symptoms of ADHD at baseline (p69). |
| 329.009.00199     | PV non compliance                     | PV non compliance                          | 77% and 71% compliance                                                                                                                   |
| 329.009.00262     | Lack of Efficacy                      | Lack of Efficacy                           | Non-responder (HAM-D)                                                                                                                    |

**CRF REVIEW:** Out of 40 reviewed CRFs, 3 changes to reasons for withdrawal were proposed:

|                                        | <b>Patient ID</b> | <b>GSK Reason for withdrawal (as per Appendix G)</b> | <b>RIAT reason for withdrawal</b> |
|----------------------------------------|-------------------|------------------------------------------------------|-----------------------------------|
| <b>'Reason for withdrawal' changes</b> | 329.002.00243     | AE (accident/trauma)                                 | AE (postural hypotension)         |
|                                        | 329.004.00211     | AE (dehydration)                                     | AE (nausea/vomiting)              |
|                                        | 329.012.00223     | Lack of Efficacy                                     | AE (suicidal gesture)             |

A further 10 participants from the cohort of reviewed CRFs, who were described as having withdrawn for 'AE including intercurrent illness' according to Appendix G, were further defined. These were as follows:

|                                       | Patient ID    | GSK reason for withdrawal (as per Appendix G) | RIAT reason for withdrawal     |
|---------------------------------------|---------------|-----------------------------------------------|--------------------------------|
| <b>Adverse events further defined</b> | 329.001.00061 | AE inc intercurrent illness                   | AE (widened QTc)               |
|                                       | 329.001.00066 | AE inc intercurrent illness                   | AE (tachycardia)               |
|                                       | 329.001.00067 | AE inc intercurrent illness                   | AE (postural hypotension)      |
|                                       | 329.001.00070 | AE inc intercurrent illness                   | AE (tachycardia)               |
|                                       | 329.003.00073 | AE inc intercurrent illness                   | AE (vomiting)                  |
|                                       | 329.004.00014 | AE inc intercurrent illness                   | AE (nausea)                    |
|                                       | 329.005.00003 | AE inc intercurrent illness                   | AE (tachycardia)               |
|                                       | 329.004.00215 | AE inc intercurrent illness                   | AE (hallucinations/nightmares) |
|                                       | 329.005.00113 | AE inc intercurrent illness                   | AE (suicidal)                  |
|                                       | 329.009.00236 | AE inc intercurrent illness                   | AE (dizziness/sedation)        |

### **c) Placebo group**

**TAPER PHASE:** In total 66 patients completed the 8 week acute phase. Of these, 32 were discontinued at the 8 week visit. A number of changes to the 'reason for discontinuation' are proposed:

| Patient ID    | GSK reason for discontinuation | Proposed reason for discontinuation | Notes                                       |
|---------------|--------------------------------|-------------------------------------|---------------------------------------------|
| 329.001.00069 | Lack of Efficacy               | Lack of Efficacy                    | Non-responder (HAM-D)                       |
| 329.001.00071 | Lack of Efficacy               | Lack of Efficacy                    | Non-responder (HAM-D)                       |
| 329.001.00207 | Lack of Efficacy               | Other (misc)                        | HAM-D scores indicate patient a 'Responder' |
| 329.002.00049 | Lack of Efficacy               | Lack of Efficacy                    | Non-responder (HAM-D)                       |
| 329.002.00059 | Lack of Efficacy               | Lack of Efficacy                    | Non-responder (HAM-D)                       |
| 329.002.00246 | Lack of Efficacy               | Lack of Efficacy                    | Non-responder (HAM-D)                       |
| 329.003.00078 | Lack of Efficacy               | Other (misc)                        | HAM-D scores indicate patient a 'Responder' |
| 329.003.00080 | Lack of Efficacy               | Lack of Efficacy                    | Non-responder (HAM-D)                       |
| 329.003.00085 | Lack of Efficacy               | Lack of Efficacy                    | Non-responder (HAM-D)                       |
| 329.003.00094 | Lack of Efficacy               | Lack of Efficacy                    | Non-responder (HAM-D)                       |
| 329.003.00252 | Lack of Efficacy               | Other (misc)                        | HAM-D scores indicate patient a 'Responder' |
| 329.003.00315 | Withdrawn consent              | Withdrawn consent                   |                                             |
| 329.003.00316 | Lack of Efficacy               | Lack of Efficacy                    | Non-responder (HAM-D)                       |



|               |                            |                         |                                             |
|---------------|----------------------------|-------------------------|---------------------------------------------|
| 329.004.00018 | Withdrawn consent          | Withdrawn consent       |                                             |
| 329.005.00001 | Lack of Efficacy           | Lack of Efficacy        | Non-responder (HAM-D)                       |
| 329.005.00120 | Lack of Efficacy           | Other (misc)            | HAM-D scores indicate patient a 'Responder' |
| 329.005.00253 | Lack of Efficacy           | Lack of Efficacy        | Non-responder (HAM-D)                       |
| 329.005.00293 | Other (no study meds)      | PV (investigator)       |                                             |
| 329.005.00331 | Other (no study meds)      | PV (investigator)       |                                             |
| 329.006.00259 | Lack of Efficacy           | Lack of Efficacy        | Non-responder (HAM-D)                       |
| 329.007.00266 | Other 'moved out of state' | Withdrawn consent       |                                             |
| 329.007.00267 | PV (positive drug test)    | PV (positive drug test) |                                             |
| 329.009.00136 | Lack of Efficacy           | Lack of Efficacy        | Non-responder (HAM-D)                       |
| 329.009.00198 | Lack of Efficacy           | Lack of Efficacy        | Non-responder (HAM-D)                       |
| 329.009.00238 | Lack of Efficacy           | Other (misc)            | HAM-D scores indicate patient a 'Responder' |
| 329.009.00276 | Lack of Efficacy           | Other (misc)            | HAM-D scores indicate patient a 'Responder' |
| 329.009.00306 | Lack of Efficacy           | Lack of Efficacy        | Non-responder (HAM-D)                       |
| 329.009.00312 | Lack of Efficacy           | Lack of Efficacy        | Non-responder (HAM-D)                       |
| 329.010.00263 | Withdrawn consent          | Withdrawn consent       |                                             |
| 329.010.00282 | Other (no study meds)      | PV (investigator)       |                                             |
| 329.011.00285 | Lack of Efficacy           | Lack of Efficacy        | Non-responder (HAM-D)                       |
| 329.011.00287 | Withdrawn consent          | Withdrawn consent       |                                             |

CRF REVIEW: Out of 22 CRFs checked, 6 changes to reasons for withdrawal were proposed. A further 1 participant who was described as having withdrawn for 'AE including intercurrent illness' according to Appendix G was defined. These were as follows:

|                                        | Patient ID    | GSK reason for withdrawal (as per Appendix G)       | RIAT reason for withdrawal           |
|----------------------------------------|---------------|-----------------------------------------------------|--------------------------------------|
| <b>'Reason for withdrawal' changes</b> | 329.006.00037 | PV non compliance (pt refused FU safety evaluation) | PV by investigator (screening error) |
|                                        | 329.007.00141 | AE (angina)                                         | PV by investigator (screening error) |
|                                        | 329.009.00129 | Lack of Efficacy                                    | AE (suicidal)                        |
|                                        | 329.009.00237 | PV non compliance                                   | PV by investigator (screening error) |
|                                        | 329.009.00327 | Lack of Efficacy                                    | AE (anxiety/depression worse)        |
|                                        | 329.012.00217 | AE (ambivalence about meds)                         | PV by investigator (screening error) |
| <b>Adverse Events further defined</b>  | 329.009.00330 | AE inc intercurrent illness                         | AE (nausea/vomiting)                 |

**Table I - Baseline screening errors (found during safety review)**

Five 'Protocol violations by investigator' were found in the placebo group, one in the imipramine group, and none in the paroxetine:

| <b>Patient ID number</b> | <b>Drug Group</b> | <b>Inclusion criteria error</b>                                                                                                                                                                                                                                                                                                                                                                |
|--------------------------|-------------------|------------------------------------------------------------------------------------------------------------------------------------------------------------------------------------------------------------------------------------------------------------------------------------------------------------------------------------------------------------------------------------------------|
| <b>329.012.00221</b>     | Imipramine        | Patient reported as having 'severe' suicidal ideation at the initial screening/baseline visits on both Kiddie-SADS (5-severe) and HAM-D (3 – suicidal ideas/gestures).                                                                                                                                                                                                                         |
| <b>329.002.00241</b>     | Placebo           | Patient reported as having 'severe' suicidal ideation at the initial screening visit. Two suicidal acts were reported within the current depressive episode with one of these occurring within the last 2 weeks. The patient also found to have an abnormality (arrhythmia) during baseline EKG, however this was cleared following a referral to a cardiologist.                              |
| <b>329.006.00037</b>     | Placebo           | Patient had a severity score HIGHER than 60 on the Clinical Global Assessment Scale (C-GAS). Reported as a PV in CRF query logs.                                                                                                                                                                                                                                                               |
| <b>329.007.00141</b>     | Placebo           | Patient was withdrawn for ANGINA however angina was reported as a presenting condition at screening. CRF states comments on reason for withdrawal ' <i>physician discretion due to comparator arm, vis-à-vis AE of chest pain.</i> '                                                                                                                                                           |
| <b>329.009.00237</b>     | Placebo           | ELIGIBILITY CHECKLIST ' <i>Is patient currently in episode of Major Depression for at least 8 weeks?</i> ' 'NO' is checked – therefore not meeting criteria for MDD. In addition patient found to have SINUS BRADYCARDIA at screening.                                                                                                                                                         |
| <b>329.012.217</b>       | Placebo           | Has been re-coded as 'PV by investigator'. Patient was 'extremely' suicidal at screening with no suicidal acts (see Kiddie-SADS & HAM-D). Patient showed 'worsening depression' during the study, was admitted to hospital during week 4 and given Zoloft. GSK reason for withdrawal was AE 'ambivalence towards meds'. Alternatively could argue was withdrawn for 'AE worsening depression'. |

**Table J – Suicidality at screening (Kiddie-SADS)**

From the sample of reviewed CRFs, 27% of patients were reported as having severe (or extreme) suicidal ideation at screening, compared with 13% in the paroxetine group and 3% in imipramine (see table 5).

**a) Kiddie-SADS items 108 to 117 ‘Suicidal Ideation’ at screening visit (-1 week)**

|                                           |                        | <b>Paroxetine<br/>N=31</b> | <b>Imipramine<br/>N=40</b> | <b>Placebo<br/>N=22</b> |
|-------------------------------------------|------------------------|----------------------------|----------------------------|-------------------------|
| <b>Suicidal Ideation</b>                  | <b>Current episode</b> | 2.9                        | 2.7                        | 3.1                     |
|                                           | <b>Last 2 weeks</b>    | 2.2                        | 2.3                        | 2.6                     |
| <b>Number of Suicidal Acts</b>            | <b>Current episode</b> | 0.0                        | 0.1                        | 0.3                     |
|                                           | <b>Last 2 weeks</b>    | 0.0                        | 0.0                        | 0.0                     |
| <b>Seriousness of Suicidal acts</b>       | <b>Current episode</b> | 0.7                        | 0.6                        | 0.7                     |
|                                           | <b>Last 2 weeks</b>    | 0.5                        | 0.5                        | 0.5                     |
| <b>Medical lethality of suicidal acts</b> | <b>Current episode</b> | 0.6                        | 0.5                        | 0.6                     |
|                                           | <b>Last 2 weeks</b>    | 0.5                        | 0.4                        | 0.4                     |
| <b>Number of non suicidal self harm</b>   | <b>Current episode</b> | 1.7                        | 1.3                        | 0.9                     |
|                                           | <b>Last 2 weeks</b>    | 1.3                        | 1.1                        | 0.7                     |

NB. Rating scale from 0 (n/a) to 7 (very extreme)

**b) Kiddie-SADS item 108 ‘Suicidal Ideation’ - ‘Current Episode’ at screening (-1 week)**

|                                    | <b>Paroxetine<br/>N=31</b> | <b>Imipramine<br/>N=40</b> | <b>Placebo<br/>N=22</b> |
|------------------------------------|----------------------------|----------------------------|-------------------------|
| 0 - N/A                            | 0                          | 0                          | 0                       |
| 1 - None                           | 6<br>(19%)                 | 7<br>(18%)                 | 4<br>(18%)              |
| 2 - Min                            | 7<br>(23%)                 | 12<br>(30%)                | 4<br>(18%)              |
| 3 - Mild                           | 7<br>(23%)                 | 10<br>(25%)                | 6<br>(27%)              |
| 4 - Moderate                       | 7<br>(23%)                 | 10<br>(25%)                | 2<br>(9%)               |
| 5 + - Severe/EXTREME/<br>V EXTREME | 4<br>(13%)                 | 1<br>(3%)                  | 6<br>(27%)              |

**c) Kiddie-SADS item 109 'Suicidal ideation' – 'Last Two Weeks' at Screening (-1 week)**

|                                    | <b>Paroxetine<br/>N=31</b> | <b>Imipramine<br/>N=40</b> | <b>Placebo<br/>N=22</b> |
|------------------------------------|----------------------------|----------------------------|-------------------------|
| 0 - N/A                            | 0                          | 0                          | 0                       |
| 1 - None                           | 14<br>(45%)                | 13<br>(33%)                | 6<br>(27%)              |
| 2 - Min                            | 7<br>(23%)                 | 9<br>(23%)                 | 5<br>(23%)              |
| 3 - Mild                           | 3<br>(10%)                 | 12<br>(30%)                | 4<br>(18%)              |
| 4 - Moderate                       | 5<br>(16%)                 | 5<br>(13%)                 | 5<br>(23%)              |
| 5 + - Severe/EXTREME/<br>V EXTREME | 2<br>(6%)                  | 1<br>(3%)                  | 2<br>(9%)               |

**Table K – Types of medication taken 1 month prior to enrolment**

| <b>ATC Level 2 drug type grouping</b> | <b>Drug</b>                                    | <b>Paroxetine (n=24)</b> | <b>Imipramine (n=31)</b> | <b>Placebo (n=26)</b> |
|---------------------------------------|------------------------------------------------|--------------------------|--------------------------|-----------------------|
| <b>Analgesics</b>                     | Acetylsalicylic acid (aspirin)                 | 1                        | 1                        | 0                     |
|                                       | cinnamedrine hydrochloride (Midol)             | 1                        | 0                        | 0                     |
|                                       | paracetamol                                    | 10                       | 9                        | 4                     |
|                                       | Paracetamol plus (Tylenol/Benadryl cold/flu)   | 2                        | 1                        | 1                     |
|                                       | Codeine phosphate                              | 0                        | 1                        | 0                     |
|                                       | Diphenhydramine citrate (Exedrin PM)           | 0                        | 1                        | 0                     |
|                                       | Mepyramine maleate (Pamprin)                   | 0                        | 0                        | 1                     |
|                                       | Analgesic unknown                              | 0                        | 1                        | 1                     |
|                                       | Unknown Chinese medicine                       | 0                        | 1                        | 0                     |
|                                       | <b>Total</b>                                   | <b>14</b>                | <b>15</b>                | <b>7</b>              |
| <b>Antibiotics</b>                    | amoxicillin                                    | 1                        | 2                        | 4                     |
|                                       | tetracycline                                   | 1                        | 0                        | 0                     |
|                                       | erythromycin                                   | 0                        | 1                        | 2                     |
|                                       | azithromycin                                   | 0                        | 0                        | 1                     |
|                                       |                                                | <b>Total</b>             | <b>2</b>                 | <b>3</b>              |
| <b>Psychoanaleptics</b>               | Fluoxetine (Prozac)                            | 1                        | 0                        | 0                     |
|                                       | Sertraline                                     | 1                        | 0                        | 0                     |
|                                       | Amitriptyline                                  | 0                        | 0                        | 1                     |
|                                       |                                                | <b>Total</b>             | <b>2</b>                 | <b>0</b>              |
| <b>Psycholeptics</b>                  | diazepam                                       | 0                        | 0                        | 1                     |
|                                       |                                                | <b>Total</b>             | <b>0</b>                 | <b>0</b>              |
| <b>Ophthalmologicals</b>              | Polymyxin b sulphate (eye drops)               | 1                        | 0                        | 0                     |
|                                       | Sulfacetamide sodium                           | 0                        | 1                        | 0                     |
|                                       |                                                | <b>Total</b>             | <b>1</b>                 | <b>1</b>              |
| <b>Systemic antihistamine</b>         | loratadine                                     | 1                        | 0                        | 0                     |
|                                       |                                                | <b>Total</b>             | <b>1</b>                 | <b>0</b>              |
| <b>Antipruritics</b>                  | Diphenhydramine hydrochloride                  | 1                        | 0                        | 2                     |
|                                       |                                                | <b>Total</b>             | <b>1</b>                 | <b>0</b>              |
| <b>GI Antispas/ anticholin</b>        | Phenobarbital, hyocyamine, atropine (Donnatal) | 1                        | 0                        | 0                     |
|                                       |                                                | <b>Total</b>             | <b>1</b>                 | <b>0</b>              |

|                                |                                                 |          |          |          |
|--------------------------------|-------------------------------------------------|----------|----------|----------|
| <b>Vaccines</b>                | Hepatitis B vaccine                             | 1        | 0        | 0        |
|                                | <b>Total</b>                                    | <b>1</b> | <b>0</b> | <b>0</b> |
| <b>Nasal prep</b>              | Clemastine fumarate (Tavist-D)                  | 1        | 0        | 0        |
|                                | <b>Total</b>                                    | <b>1</b> | <b>0</b> | <b>0</b> |
| <b>Antianaemic prep</b>        | Vit B 12                                        | 0        | 1        | 0        |
|                                | <b>Total</b>                                    | <b>0</b> | <b>1</b> | <b>0</b> |
| <b>Sex hormones/stimulants</b> | Ethinylestradiol (Desogen28; Loestrin or Ovcon) | 0        | 3        | 1        |
|                                | Oral contraceptive unknown                      | 0        | 1        | 0        |
|                                | Injectable contraceptive (NOS)                  | 0        | 0        | 1        |
|                                | <b>Total</b>                                    | <b>0</b> | <b>4</b> | <b>2</b> |
| <b>Antimycotics</b>            | Ketoconazole (Nizoral)                          | 0        | 1        | 0        |
|                                | <b>Total</b>                                    | <b>0</b> | <b>1</b> | <b>0</b> |
| <b>Anti inflammatory</b>       | ibuprofen                                       | 0        | 3        | 1        |
|                                | Naproxen sodium                                 | 0        | 0        | 1        |
|                                | oxaprozin                                       | 0        | 0        | 1        |
|                                | <b>Total</b>                                    | <b>0</b> | <b>3</b> | <b>3</b> |
| <b>Cough &amp; cold prep</b>   | Dextromethorphan hydrobromide (Nyquil)          | 0        | 1        | 0        |
|                                | Guaifenesin (Robitussin)                        | 0        | 1        | 0        |
|                                | <b>Total</b>                                    | <b>0</b> | <b>2</b> | <b>0</b> |
| <b>Antidiarrhea</b>            | Loperamide hydrochloride                        | 0        | 1        | 0        |
|                                | <b>Total</b>                                    | <b>0</b> | <b>1</b> | <b>0</b> |
| <b>Antiasthmatics</b>          | salbutamol                                      | 0        | 0        | 1        |
|                                | <b>Total</b>                                    | <b>0</b> | <b>0</b> | <b>1</b> |
| <b>Chemotherapeutics</b>       | Trimethoprim (Bactrim)                          | 0        | 0        | 1        |
|                                | <b>Total</b>                                    | <b>0</b> | <b>0</b> | <b>1</b> |
| <b>Antiepileptics</b>          | clonazepam                                      | 0        | 0        | 1        |
|                                | <b>Total</b>                                    | <b>0</b> | <b>0</b> | <b>1</b> |

**Table L – Adverse events occurring in patients taking other medication prior to enrolment vs. those taking no other medication**

**a) Paroxetine group**

| <b>SOC</b>                        | <b>MedDRA preferred term</b> | <b>Patients taking ‘other Medications’ during month pre-enrolment</b> | <b>Patients taking ‘No Medication’ during month pre-enrolment</b> |
|-----------------------------------|------------------------------|-----------------------------------------------------------------------|-------------------------------------------------------------------|
| <b>Gastrointestinal Disorders</b> | Abdominal pain               | 0                                                                     | 0                                                                 |
|                                   | Constipation                 | 0                                                                     | 7                                                                 |
|                                   | Cramps                       | 3                                                                     | 11                                                                |
|                                   | Diarrhea                     | 1                                                                     | 11                                                                |
|                                   | Dry Mouth                    | 5                                                                     | 15                                                                |
|                                   | Dyspepsia                    | 1                                                                     | 7                                                                 |
|                                   | Food poisoning               | 1                                                                     | 0                                                                 |
|                                   | Gastroenteritis              | 0                                                                     | 0                                                                 |
|                                   | Nausea                       | 8                                                                     | 29                                                                |
|                                   | Reflux                       | 1                                                                     | 0                                                                 |
|                                   | Retching                     | 0                                                                     | 0                                                                 |
|                                   | Sores                        | 0                                                                     | 0                                                                 |
|                                   | Stomatitis                   | 0                                                                     | 0                                                                 |
|                                   | Ulcer                        | 0                                                                     | 1                                                                 |
|                                   | Vomiting                     | 2                                                                     | 9                                                                 |
|                                   | <b>TOTAL</b>                 | <b>22</b>                                                             | <b>90</b>                                                         |
| <b>Nervous system disorders</b>   | Bad taste                    | 0                                                                     | 0                                                                 |
|                                   | Convulsion                   | 0                                                                     | 0                                                                 |
|                                   | Dystonia                     | 4                                                                     | 1                                                                 |
|                                   | Headache                     | 25                                                                    | 34                                                                |
|                                   | Laryngitis                   | 0                                                                     | 1                                                                 |
|                                   | Memory loss                  | 0                                                                     | 0                                                                 |
|                                   | Migraine                     | 0                                                                     | 1                                                                 |
|                                   | Myoclonus                    | 3                                                                     | 1                                                                 |
|                                   | Paresthesia                  | 0                                                                     | 1                                                                 |
|                                   | Sore throat                  | 7                                                                     | 3                                                                 |
|                                   | Tics                         | 0                                                                     | 1                                                                 |
|                                   | Tinnitus                     | 0                                                                     | 0                                                                 |
|                                   | Toothache                    | 4                                                                     | 2                                                                 |
|                                   | Tremor                       | 4                                                                     | 7                                                                 |
|                                   | Vision blurred               | 0                                                                     | 2                                                                 |
|                                   | <b>TOTAL</b>                 | <b>47</b>                                                             | <b>54</b>                                                         |
| <b>General disorders</b>          | Fatigue                      | 6                                                                     | 9                                                                 |
|                                   | Fever                        | 0                                                                     | 0                                                                 |
|                                   | Pain                         | 0                                                                     | 0                                                                 |
|                                   | <b>TOTAL</b>                 | <b>6</b>                                                              | <b>9</b>                                                          |
| <b>Psychiatric disorders</b>      | Abnormal dreams              | 0                                                                     | 3                                                                 |
|                                   | Aggravated depression        | 0                                                                     | 5                                                                 |
|                                   | Aggression                   | 1                                                                     | 6                                                                 |
|                                   | Agitation                    | 0                                                                     | 1                                                                 |
|                                   | Akathisia                    | 10                                                                    | 8                                                                 |

|                                                        |                           |              |           |
|--------------------------------------------------------|---------------------------|--------------|-----------|
|                                                        | Anorgasmia                | 1            | 0         |
|                                                        | Anxiety                   | 0            | 2         |
|                                                        | Concentration low         | 1            | 1         |
|                                                        | Depersonalisation         | 0            | 0         |
|                                                        | Disinhibition             | 1            | 3         |
|                                                        | Drug withdrawal syndrome  | 0            | 2         |
|                                                        | Hallucination             | 0            | 1         |
|                                                        | Impulsive behaviour       | 0            | 1         |
|                                                        | Insomnia                  | 4            | 12        |
|                                                        | Paranoia                  | 1            | 0         |
|                                                        | Psychosis                 | 0            | 1         |
|                                                        | Somnolence                | 9            | 15        |
|                                                        | Substance abuse           | 0            | 1         |
|                                                        | Suicidal ideation/gesture | 0            | 5         |
|                                                        | Suicide attempt           | 2            | 6         |
|                                                        | <b>TOTAL</b>              | <b>30</b>    | <b>73</b> |
|                                                        |                           |              |           |
| <b>Respiratory, thoracic and mediastinal disorders</b> | Coughing                  | 4            | 2         |
|                                                        | Chest cold                | 2            | 9         |
|                                                        | Epistaxis                 | 0            | 1         |
|                                                        | Dyspnea                   | 0            | 3         |
|                                                        | Nasopharyngitis           | 2            | 1         |
|                                                        | Respiratory disorder      | 0            | 0         |
|                                                        | Rhinitis                  | 4            | 6         |
|                                                        | Sinusitis                 | 3            | 5         |
|                                                        | Sneezing                  | 0            | 0         |
|                                                        | <b>TOTAL</b>              | <b>15</b>    | <b>27</b> |
|                                                        |                           |              |           |
| <b>Cardiac disorders</b>                               | Atrial ectopic            | 0            | 0         |
|                                                        | AV block                  | 0            | 1         |
|                                                        | Bradycardia               | 0            | 0         |
|                                                        | Bundle branch block       | 0            | 0         |
|                                                        | Dizziness                 | 14           | 21        |
|                                                        | Chest pain                | 0            | 2         |
|                                                        | ECG/ T-ECG abnormal       | 0            | 0         |
|                                                        | Hot flush                 | 0            | 0         |
|                                                        | Hypertension              | 0            | 0         |
|                                                        | Postural hypotension      | 1            | 2         |
|                                                        | QT interval prolonged     | 0            | 0         |
|                                                        | Tachycardia               | 1            | 2         |
|                                                        |                           | <b>TOTAL</b> | <b>16</b> |
|                                                        |                           |              |           |
| <b>Skin and subcutaneous tissue disorders</b>          | Acne                      | 1            | 2         |
|                                                        | Dermatitis                | 0            | 1         |
|                                                        | Itchy                     | 0            | 0         |
|                                                        | Rash                      | 1            | 3         |
|                                                        | Scabies                   | 0            | 0         |
|                                                        | Sweating                  | 1            | 1         |
|                                                        | Syncope                   | 0            | 0         |
|                                                        |                           | <b>TOTAL</b> | <b>3</b>  |
|                                                        |                           |              |           |
|                                                        |                           |              |           |

|                                                        |                     |          |           |
|--------------------------------------------------------|---------------------|----------|-----------|
| <b>Renal and urinary disorders</b>                     | Albuminuria         | 0        | 0         |
|                                                        | Cystitis            | 0        | 1         |
|                                                        | Nocturia            | 0        | 0         |
|                                                        | Polyuria            | 0        | 0         |
|                                                        | Pyuria              | 0        | 0         |
|                                                        | Urinary abnormality | 1        | 2         |
|                                                        | Urinary retention   | 0        | 0         |
|                                                        | UTI                 | 0        | 1         |
|                                                        | <b>TOTAL</b>        | <b>1</b> | <b>4</b>  |
| <b>Immune system disorders</b>                         | Allergy             | 0        | 1         |
|                                                        | Urticaria           | 0        | 1         |
|                                                        | <b>TOTAL</b>        | <b>0</b> | <b>2</b>  |
| <b>Endocrine disorders</b>                             | Amenorrhea          | 1        | 0         |
|                                                        | Hyperglycemia       | 0        | 0         |
|                                                        | <b>TOTAL</b>        | <b>1</b> | <b>0</b>  |
| <b>Blood and lymphatic system disorders</b>            | Anaemia             | 0        | 1         |
|                                                        | Eosinophilia        | 0        | 0         |
|                                                        | Leukopenia          | 0        | 0         |
|                                                        | Lymphadenopathy     | 0        | 0         |
|                                                        | Thrombocythemia     | 0        | 0         |
|                                                        | <b>TOTAL</b>        | <b>0</b> | <b>1</b>  |
| <b>Musculoskeletal and connective tissue disorders</b> | Arthralgia          | 1        | 0         |
|                                                        | Back pain           | 5        | 0         |
|                                                        | Chills              | 0        | 0         |
|                                                        | Myalgia             | 0        | 2         |
|                                                        | <b>TOTAL</b>        | <b>6</b> | <b>2</b>  |
| <b>Reproductive system and breast disorder</b>         | Breast enlargement  | 0        | 1         |
|                                                        | Dysmenorrhea        | 2        | 1         |
|                                                        | <b>TOTAL</b>        | <b>2</b> | <b>2</b>  |
| <b>Infections</b>                                      | Herpes zoster       | 0        | 0         |
|                                                        | Infection           | 2        | 2         |
|                                                        | Otitis media        | 0        | 2         |
|                                                        | <b>TOTAL</b>        | <b>2</b> | <b>4</b>  |
| <b>Eye disorders</b>                                   | Conjunctivitis      | 2        | 0         |
|                                                        | Itchy eyes          | 1        | 1         |
|                                                        | Mydriasis           | 0        | 0         |
|                                                        | Photosensitivity    | 0        | 1         |
|                                                        | Photopsia           | 0        | 0         |
|                                                        | <b>TOTAL</b>        | <b>3</b> | <b>2</b>  |
| <b>Metabolism and nutritional disorders</b>            | Decreased appetite  | 3        | 6         |
|                                                        | Increased appetite  | 0        | 4         |
|                                                        | Thirst              | 0        | 0         |
|                                                        | Weight gain         | 1        | 1         |
|                                                        | Weight loss         | 0        | 2         |
|                                                        | <b>TOTAL</b>        | <b>4</b> | <b>13</b> |



|                                                         |                  |            |            |
|---------------------------------------------------------|------------------|------------|------------|
| <b>Ear and labyrinth disorders</b>                      | Ear pain         | 0          | 1          |
|                                                         | <b>TOTAL</b>     | <b>0</b>   | <b>1</b>   |
| <b>Injuries, poisoning and procedural complications</b> | Head injury      | 0          | 0          |
|                                                         | Overdose         | 0          | 0          |
|                                                         | Trauma           | 0          | 3          |
|                                                         | <b>TOTAL</b>     | <b>0</b>   | <b>3</b>   |
| <b>Pregnancy, puerperium and perinatal conditions</b>   | Pregnancy        | 0          | 0          |
|                                                         | <b>TOTAL</b>     | <b>0</b>   | <b>0</b>   |
| <b>Surgical and medical procedures</b>                  | Tooth extraction | 0          | 1          |
|                                                         | <b>TOTAL</b>     | <b>0</b>   | <b>1</b>   |
| <b>Total number of AEs</b>                              |                  | <b>158</b> | <b>323</b> |

**b) Imipramine group**

| <b>SOC</b>                        | <b>MedDRA preferred term</b> | <b>Patients taking 'other Medications' during month pre-enrolment</b> | <b>Patients taking 'No Medication' during month pre-enrolment</b> |
|-----------------------------------|------------------------------|-----------------------------------------------------------------------|-------------------------------------------------------------------|
| <b>Gastrointestinal Disorders</b> | Abdominal pain               | 0                                                                     | 0                                                                 |
|                                   | Constipation                 | 2                                                                     | 8                                                                 |
|                                   | Cramps                       | 1                                                                     | 10                                                                |
|                                   | Diarrhea                     | 6                                                                     | 2                                                                 |
|                                   | Dry Mouth                    | 15                                                                    | 33                                                                |
|                                   | Dyspepsia                    | 4                                                                     | 8                                                                 |
|                                   | Food poisoning               | 0                                                                     | 0                                                                 |
|                                   | Gastroenteritis              | 0                                                                     | 1                                                                 |
|                                   | Nausea                       | 14                                                                    | 29                                                                |
|                                   | Reflux                       | 0                                                                     | 0                                                                 |
|                                   | Retching                     | 0                                                                     | 1                                                                 |
|                                   | Sores                        | 0                                                                     | 0                                                                 |
|                                   | Stomatitis                   | 0                                                                     | 2                                                                 |
|                                   | Vomiting                     | 6                                                                     | 5                                                                 |
| <b>TOTAL</b>                      | <b>48</b>                    | <b>99</b>                                                             |                                                                   |
| <b>Nervous system disorders</b>   | Bad taste                    | 1                                                                     | 2                                                                 |
|                                   | Convulsion                   | 1                                                                     | 0                                                                 |
|                                   | Dystonia                     | 2                                                                     | 5                                                                 |
|                                   | Headache                     | 32                                                                    | 27                                                                |
|                                   | Laryngitis                   | 0                                                                     | 0                                                                 |
|                                   | Memory loss                  | 0                                                                     | 1                                                                 |
|                                   | Migraine                     | 1                                                                     | 0                                                                 |
|                                   | Myoclonus                    | 0                                                                     | 1                                                                 |
|                                   | Paresthesia                  | 0                                                                     | 1                                                                 |
|                                   | Sore throat                  | 7                                                                     | 5                                                                 |
| Tics                              | 0                            | 1                                                                     |                                                                   |

|                                                        |                           |           |           |
|--------------------------------------------------------|---------------------------|-----------|-----------|
|                                                        | Tinnitus                  | 0         | 2         |
|                                                        | Toothache                 | 0         | 0         |
|                                                        | Tremor                    | 14        | 6         |
|                                                        | Vision blurred            | 1         | 4         |
|                                                        | <b>TOTAL</b>              | <b>59</b> | <b>55</b> |
|                                                        |                           |           |           |
| <b>General disorders</b>                               | Fatigue                   | 5         | 3         |
|                                                        | Fever                     | 0         | 2         |
|                                                        | Pain                      | 0         | 0         |
|                                                        | <b>TOTAL</b>              | <b>5</b>  | <b>5</b>  |
|                                                        |                           |           |           |
| <b>Psychiatric disorders</b>                           | Abnormal dreams           | 1         | 4         |
|                                                        | Aggravated depression     | 2         | 1         |
|                                                        | Aggression                | 1         | 2         |
|                                                        | Agitation                 | 0         | 1         |
|                                                        | Akathisia                 | 6         | 6         |
|                                                        | Anorgasmia                | 0         | 0         |
|                                                        | Anxiety                   | 0         | 0         |
|                                                        | Concentration low         | 1         | 0         |
|                                                        | Depersonalisation         | 0         | 1         |
|                                                        | Disinhibition             | 0         | 1         |
|                                                        | Drug withdrawal syndrome  | 0         | 0         |
|                                                        | Hallucinations            | 1         | 0         |
|                                                        | Insomnia                  | 3         | 11        |
|                                                        | Paranoia                  | 0         | 0         |
|                                                        | Psychosis                 | 0         | 0         |
|                                                        | Somnolence                | 3         | 11        |
|                                                        | Substance abuse           | 0         | 1         |
|                                                        | Suicidal ideation/gesture | 0         | 3         |
|                                                        | Suicide attempt           | 1         | 2         |
|                                                        | <b>TOTAL</b>              | <b>19</b> | <b>44</b> |
|                                                        |                           |           |           |
| <b>Respiratory, thoracic and mediastinal disorders</b> | Coughing                  | 2         | 2         |
|                                                        | Chest cold                | 0         | 6         |
|                                                        | Epistaxis                 | 0         | 1         |
|                                                        | Dyspnea                   | 4         | 1         |
|                                                        | Nasopharyngitis           | 0         | 0         |
|                                                        | Respiratory disorder      | 0         | 0         |
|                                                        | Rhinitis                  | 1         | 2         |
|                                                        | Sinusitis                 | 2         | 1         |
|                                                        | Sneezing                  | 0         | 0         |
|                                                        | <b>TOTAL</b>              | <b>9</b>  | <b>13</b> |
|                                                        |                           |           |           |
| <b>Cardiac disorders</b>                               | Atrial ectopic            | 0         | 0         |
|                                                        | AV block                  | 1         | 1         |
|                                                        | Bradycardia               | 0         | 1         |
|                                                        | Bundle branch block       | 0         | 1         |
|                                                        | Dizziness                 | 19        | 38        |
|                                                        | Chest pain                | 4         | 1         |
|                                                        | ECG/ T-ECG abnormal       | 3         | 4         |
|                                                        | Hot flush                 | 3         | 3         |
|                                                        | Hypertension              | 0         | 2         |
|                                                        | Arrhythmia                | 0         | 1         |
|                                                        | Postural hypotension      | 7         | 10        |
|                                                        | QT interval prolonged     | 2         | 1         |

|                                                        |                     |           |           |
|--------------------------------------------------------|---------------------|-----------|-----------|
|                                                        | Tachycardia         | 12        | 16        |
|                                                        | <b>TOTAL</b>        | <b>51</b> | <b>79</b> |
|                                                        |                     |           |           |
| <b>Skin and subcutaneous tissue disorders</b>          | Acne                | 2         | 0         |
|                                                        | Dermatitis          | 2         | 0         |
|                                                        | Itchy               | 0         | 1         |
|                                                        | Rash                | 2         | 3         |
|                                                        | Scabies             | 0         | 0         |
|                                                        | Sweating            | 5         | 2         |
|                                                        | <b>TOTAL</b>        | <b>11</b> | <b>6</b>  |
|                                                        |                     |           |           |
| <b>Renal and urinary disorders</b>                     | Albuminuria         | 0         | 0         |
|                                                        | Cystitis            | 0         | 0         |
|                                                        | Nocturia            | 1         | 0         |
|                                                        | Polyuria            | 0         | 1         |
|                                                        | Pyuria              | 0         | 1         |
|                                                        | Urinary abnormality | 0         | 0         |
|                                                        | Urinary retention   | 1         | 5         |
|                                                        | <b>TOTAL</b>        | <b>2</b>  | <b>7</b>  |
|                                                        |                     |           |           |
| <b>Immune system disorders</b>                         | Allergy             | 0         | 1         |
|                                                        | Urticaria           | 1         | 0         |
|                                                        | <b>TOTAL</b>        | <b>1</b>  | <b>1</b>  |
|                                                        |                     |           |           |
| <b>Endocrine disorders</b>                             | Amenorrhea          | 0         | 0         |
|                                                        | Hyperglycemia       | 1         | 0         |
|                                                        | <b>TOTAL</b>        | <b>1</b>  | <b>0</b>  |
|                                                        |                     |           |           |
| <b>Blood and lymphatic system disorders</b>            | Anaemia             | 0         | 1         |
|                                                        | Eosinophilia        | 1         | 0         |
|                                                        | Leukopenia          | 2         | 0         |
|                                                        | Lymphadenopathy     | 0         | 0         |
|                                                        | Thrombocythemia     | 0         | 0         |
|                                                        | <b>TOTAL</b>        | <b>3</b>  | <b>1</b>  |
|                                                        |                     |           |           |
| <b>Musculoskeletal and connective tissue disorders</b> | Arthralgia          | 1         | 0         |
|                                                        | Back pain           | 0         | 2         |
|                                                        | Chills              | 0         | 3         |
|                                                        | Myalgia             | 1         | 0         |
|                                                        | <b>TOTAL</b>        | <b>2</b>  | <b>5</b>  |
|                                                        |                     |           |           |
| <b>Reproductive system and breast disorders</b>        | Breast enlargement  | 0         | 0         |
|                                                        | Dysmenorrhea        | 2         | 2         |
|                                                        | <b>TOTAL</b>        | <b>2</b>  | <b>2</b>  |
|                                                        |                     |           |           |
| <b>Infections</b>                                      | Herpes zoster       | 0         | 0         |
|                                                        | Infection           | 2         | 1         |
|                                                        | Otitis media        | 1         | 1         |
|                                                        | <b>TOTAL</b>        | <b>3</b>  | <b>2</b>  |
|                                                        |                     |           |           |
| <b>Eye disorders</b>                                   | Conjunctivitis      | 0         | 0         |
|                                                        | Itchy eyes          | 0         | 1         |
|                                                        | Mydriasis           | 1         | 0         |

|                                                         |                    |            |            |
|---------------------------------------------------------|--------------------|------------|------------|
|                                                         | Photosensitivity   | 1          | 0          |
|                                                         | Photopsia          | 0          | 1          |
|                                                         | <b>TOTAL</b>       | <b>2</b>   | <b>2</b>   |
|                                                         |                    |            |            |
| <b>Metabolism and nutritional disorders</b>             | Decreased appetite | 1          | 1          |
|                                                         | Increased appetite | 0          | 1          |
|                                                         | Thirst             | 0          | 2          |
|                                                         | Weight gain        | 0          | 0          |
|                                                         | Weight loss        | 1          | 0          |
|                                                         | <b>TOTAL</b>       | <b>2</b>   | <b>4</b>   |
|                                                         |                    |            |            |
| <b>Ear and labyrinth disorders</b>                      | Ear pain           | 0          | 0          |
|                                                         | <b>TOTAL</b>       | <b>0</b>   | <b>0</b>   |
|                                                         |                    |            |            |
| <b>Injuries, poisoning and procedural complications</b> | Head injury        | 0          | 1          |
|                                                         | Overdose           | 0          | 1          |
|                                                         | Trauma             | 0          | 1          |
|                                                         | <b>TOTAL</b>       | <b>0</b>   | <b>3</b>   |
|                                                         |                    |            |            |
| <b>Pregnancy, puerperium and perinatal conditions</b>   | Pregnancy          | 0          | 2          |
|                                                         | <b>TOTAL</b>       |            | <b>2</b>   |
|                                                         |                    |            |            |
| <b>Surgical and medical procedures</b>                  | Tooth extraction   | 0          | 2          |
|                                                         | <b>TOTAL</b>       | <b>0</b>   | <b>2</b>   |
|                                                         |                    |            |            |
| <b>Total number of AEs</b>                              |                    | <b>220</b> | <b>332</b> |

c) Placebo group

| <b>SOC</b>                        | <b>MedDRA preferred term</b> | <b>Patients taking 'other Medications' during month pre-enrolment</b> | <b>Patients taking 'No Medication' during month pre-enrolment</b> |
|-----------------------------------|------------------------------|-----------------------------------------------------------------------|-------------------------------------------------------------------|
|                                   |                              |                                                                       |                                                                   |
| <b>Gastrointestinal Disorders</b> | Abdominal pain               | 2                                                                     | 0                                                                 |
|                                   | Constipation                 | 1                                                                     | 3                                                                 |
|                                   | Cramps                       | 3                                                                     | 11                                                                |
|                                   | Diarrhea                     | 6                                                                     | 3                                                                 |
|                                   | Dry Mouth                    | 4                                                                     | 8                                                                 |
|                                   | Dyspepsia                    | 0                                                                     | 4                                                                 |
|                                   | Food poisoning               | 0                                                                     | 1                                                                 |
|                                   | Gastroenteritis              | 0                                                                     | 0                                                                 |
|                                   | Nausea                       | 14                                                                    | 13                                                                |
|                                   | Reflux                       | 0                                                                     | 0                                                                 |
|                                   | Retching                     | 0                                                                     | 0                                                                 |
|                                   | Sores                        | 0                                                                     | 1                                                                 |
|                                   | Stomatitis                   | 0                                                                     | 0                                                                 |
|                                   | Vomiting                     | 2                                                                     | 3                                                                 |
|                                   | <b>TOTAL</b>                 | <b>32</b>                                                             | <b>47</b>                                                         |
|                                   |                              |                                                                       |                                                                   |

|                                                        |                           |           |           |
|--------------------------------------------------------|---------------------------|-----------|-----------|
| <b>Nervous system disorders</b>                        | Bad taste                 | 0         | 0         |
|                                                        | Convulsion                | 0         | 0         |
|                                                        | Dystonia                  | 2         | 1         |
|                                                        | Headache                  | 29        | 27        |
|                                                        | Laryngitis                | 0         | 0         |
|                                                        | Memory loss               | 0         | 0         |
|                                                        | Myoclonus                 | 0         | 0         |
|                                                        | Paresthesia               | 0         | 0         |
|                                                        | Sore throat               | 3         | 8         |
|                                                        | Tics                      | 0         | 0         |
|                                                        | Tinnitus                  | 0         | 0         |
|                                                        | Toothache                 | 1         | 2         |
|                                                        | Tremor                    | 1         | 1         |
|                                                        | Vision blurred            | 2         | 0         |
| <b>TOTAL</b>                                           | <b>38</b>                 | <b>39</b> |           |
| <b>General disorders</b>                               | Fatigue                   | 3         | 8         |
|                                                        | Fever                     | 1         | 3         |
|                                                        | Pain                      | 1         | 1         |
|                                                        | <b>TOTAL</b>              | <b>5</b>  | <b>12</b> |
| <b>Psychiatric disorders</b>                           | Abnormal dreams           | 0         | 2         |
|                                                        | Aggravated depression     | 1         | 1         |
|                                                        | Aggression                | 0         | 0         |
|                                                        | Agitation                 | 0         | 0         |
|                                                        | Akathisia                 | 2         | 6         |
|                                                        | Anorgasmia                | 0         | 0         |
|                                                        | Anxiety                   | 1         | 0         |
|                                                        | Concentration low         | 0         | 0         |
|                                                        | Depersonalisation         | 1         | 0         |
|                                                        | Disinhibition             | 0         | 2         |
|                                                        | Drug withdrawal syndrome  | 0         | 0         |
|                                                        | Hallucination             | 0         | 0         |
|                                                        | Insomnia                  | 2         | 2         |
|                                                        | Paranoia                  | 0         | 0         |
|                                                        | Psychosis                 | 0         | 0         |
|                                                        | Somnolence                | 1         | 2         |
|                                                        | Substance abuse           | 0         | 0         |
|                                                        | Suicidal ideation/gesture | 1         | 0         |
| Suicide attempt                                        | 0                         | 0         |           |
| <b>TOTAL</b>                                           | <b>9</b>                  | <b>15</b> |           |
| <b>Respiratory, thoracic and mediastinal disorders</b> | Coughing                  | 1         | 5         |
|                                                        | Chest cold                | 8         | 6         |
|                                                        | Epistaxis                 | 0         | 0         |
|                                                        | Dyspnea                   | 0         | 2         |
|                                                        | Nasopharyngitis           | 0         | 1         |
|                                                        | Respiratory disorder      | 1         | 1         |
|                                                        | Rhinitis                  | 2         | 3         |
|                                                        | Sinusitis                 | 5         | 3         |
|                                                        | Sneezing                  | 0         | 1         |
| <b>TOTAL</b>                                           | <b>17</b>                 | <b>22</b> |           |

|                                                        |                       |           |           |
|--------------------------------------------------------|-----------------------|-----------|-----------|
| <b>Cardiac disorders</b>                               | Atrial ectopic        | 1         | 0         |
|                                                        | AV block              | 1         | 1         |
|                                                        | Bradycardia           | 1         | 0         |
|                                                        | Bundle branch block   | 0         | 1         |
|                                                        | Dizziness             | 5         | 13        |
|                                                        | Chest pain            | 1         | 1         |
|                                                        | ECG/ T-ECG abnormal   | 2         | 0         |
|                                                        | Hot flush             | 1         | 1         |
|                                                        | Arrhythmia            | 0         | 1         |
|                                                        | Postural hypotension  | 1         | 0         |
|                                                        | QT interval prolonged | 0         | 0         |
|                                                        | Tachycardia           | 0         | 1         |
| <b>TOTAL</b>                                           | <b>13</b>             | <b>19</b> |           |
| <b>Skin and subcutaneous tissue disorders</b>          | Acne                  | 1         | 0         |
|                                                        | Dermatitis            | 0         | 1         |
|                                                        | Itchy                 | 1         | 0         |
|                                                        | Rash                  | 3         | 1         |
|                                                        | Scabies               | 0         | 1         |
|                                                        | Sweating              | 1         | 0         |
|                                                        | Syncope               | 0         | 1         |
|                                                        | <b>TOTAL</b>          | <b>6</b>  | <b>4</b>  |
| <b>Renal and urinary disorders</b>                     | Albuminuria           | 0         | 4         |
|                                                        | Cystitis              | 0         | 0         |
|                                                        | Nocturia              | 0         | 0         |
|                                                        | Polyuria              | 0         | 0         |
|                                                        | Pyuria                | 0         | 0         |
|                                                        | Urinary abnormality   | 0         | 0         |
|                                                        | Urinary retention     | 0         | 0         |
|                                                        | UTI                   | 0         | 0         |
| <b>TOTAL</b>                                           | <b>0</b>              | <b>4</b>  |           |
| <b>Immune system disorders</b>                         | Allergy               | 3         | 0         |
|                                                        | Urticaria             | 0         | 0         |
|                                                        | <b>TOTAL</b>          | <b>3</b>  | <b>0</b>  |
| <b>Endocrine disorders</b>                             | Amenorrhea            | 0         | 0         |
|                                                        | Hyperglycemia         | 0         | 1         |
|                                                        | <b>TOTAL</b>          | <b>0</b>  | <b>1</b>  |
| <b>Blood and lymphatic disorders</b>                   | Anaemia               | 0         | 0         |
|                                                        | Eosinophilia          | 0         | 1         |
|                                                        | Leukopenia            | 0         | 0         |
|                                                        | Lymphadenopathy       | 1         | 0         |
|                                                        | Thrombocythemia       | 0         | 1         |
| <b>TOTAL</b>                                           | <b>1</b>              | <b>2</b>  |           |
| <b>Musculoskeletal and connective tissue disorders</b> | Arthralgia            | 2         | 2         |
|                                                        | Back pain             | 3         | 7         |
|                                                        | Chills                | 0         | 0         |
|                                                        | Myalgia               | 1         | 1         |
|                                                        | <b>TOTAL</b>          | <b>6</b>  | <b>10</b> |

|                                                         |                    |            |            |
|---------------------------------------------------------|--------------------|------------|------------|
| <b>Reproductive system and breast disorder</b>          | Breast enlargement | 0          | 0          |
|                                                         | Dysmenorrhea       | 2          | 2          |
|                                                         | <b>TOTAL</b>       | <b>2</b>   | <b>2</b>   |
| <b>Infections</b>                                       | Herpes zoster      | 0          | 1          |
|                                                         | Infection          | 1          | 2          |
|                                                         | Otitis media       | 0          | 0          |
|                                                         | <b>TOTAL</b>       | <b>1</b>   | <b>3</b>   |
| <b>Eye disorders</b>                                    | Conjunctivitis     | 0          | 1          |
|                                                         | Itchy eyes         | 0          | 0          |
|                                                         | Mydriasis          | 0          | 0          |
|                                                         | Photosensitivity   | 0          | 0          |
|                                                         | Photopsia          | 0          | 0          |
|                                                         | <b>TOTAL</b>       | <b>0</b>   | <b>1</b>   |
| <b>Metabolism and nutritional disorders</b>             | Decreased appetite | 1          | 3          |
|                                                         | Increased appetite | 0          | 1          |
|                                                         | Thirst             | 1          | 1          |
|                                                         | Weight gain        | 0          | 0          |
|                                                         | Weight loss        | 1          | 1          |
|                                                         | <b>TOTAL</b>       | <b>4</b>   | <b>6</b>   |
| <b>Ear and labyrinth disorders</b>                      | Ear pain           | 0          | 0          |
|                                                         | <b>TOTAL</b>       | <b>0</b>   | <b>0</b>   |
| <b>Injuries, poisoning and procedural complications</b> | Head injury        | 0          | 0          |
|                                                         | Overdose           | 0          | 0          |
|                                                         | Trauma             | 0          | 6          |
|                                                         | <b>TOTAL</b>       | <b>0</b>   | <b>6</b>   |
| <b>Pregnancy, puerperium and perinatal conditions</b>   | Pregnancy          | 0          | 0          |
|                                                         | <b>TOTAL</b>       | <b>0</b>   | <b>0</b>   |
| <b>Surgical and medical procedures</b>                  | Tooth extraction   | 0          | 0          |
|                                                         | <b>TOTAL</b>       | <b>0</b>   | <b>0</b>   |
| <b>Total number of AEs</b>                              |                    | <b>137</b> | <b>193</b> |

**Table M – Attrition of patients by week**

| Treatment group | Efficacy [randomised] | Status | Week |    |    |    |    |    |    |    |
|-----------------|-----------------------|--------|------|----|----|----|----|----|----|----|
|                 |                       |        | 1    | 2  | 3  | 4  | 5  | 6  | 7  | 8  |
| Imipramine      | 94 [95]               | total  | 94   | 90 | 81 | 77 | 74 | 64 | 58 | 56 |
|                 |                       | data   | 91   | 88 | 77 | 69 | 68 | 63 | 57 | 56 |
| Paroxetine      | 90 [93]               | total  | 90   | 84 | 80 | 78 | 76 | 73 | 71 | 67 |
|                 |                       | data   | 88   | 81 | 77 | 76 | 72 | 72 | 68 | 67 |
| Placebo         | 87 [87]               | total  | 87   | 85 | 79 | 77 | 74 | 68 | 66 | 66 |
|                 |                       | data   | 84   | 82 | 75 | 73 | 70 | 66 | 63 | 66 |

Four of the randomised patients had no post-treatment visits [1 Imipramine, 3 Paroxetine].

“total” is the number of patients in the study for each week.

“data” is the number with data for each week.
